RESEARCH ARTICLE

# Partial IGF-1 deficiency is sufficient to reduce heart contractibility, angiotensin II sensibility, and alter gene expression of structural and functional cardiac proteins

José Luis González-Guerra<sup>1</sup> , Inma Castilla-Cortazar<sup>1,2</sup> , Gabriel A. Aguirre<sup>1</sup>, Úrsula Muñoz<sup>3</sup>, Irene Martín-Estal<sup>1</sup>, Elena Ávila-Gallego<sup>3</sup>, Miriam Granado<sup>4</sup>, Juan E. Puche<sup>3,5</sup>, Ángel Luis García-Villalón<sup>4</sup>

**1** Escuela de Medicina, Tecnológico de Monterrey, Monterrey, México, **2** Fundación de Investigación Hospitales de Madrid, HM Hospitales, Madrid, Spain, **3** Department of Medical Physiology, Faculty of Medicine, University CEU-San Pablo, Madrid, Spain, **4** Department of Physiology, Faculty of Medicine, Universidad Autónoma de Madrid, Madrid, Spain, **5** Department of Cardiology, Hospital Universitario Puerta del Mar, Cádiz, Spain

 These authors contributed equally to this work.

\* [iccortazar@itesm.mx](mailto:iccortazar@itesm.mx)

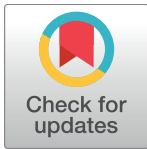

 OPEN ACCESS

**Citation:** González-Guerra JL, Castilla-Cortazar I, Aguirre GA, Muñoz Ú, Martín-Estal I, Ávila-Gallego E, et al. (2017) Partial IGF-1 deficiency is sufficient to reduce heart contractibility, angiotensin II sensibility, and alter gene expression of structural and functional cardiac proteins. PLoS ONE 12(8): e0181760. <https://doi.org/10.1371/journal.pone.0181760>

**Editor:** Michael Bader, Max Delbrück Centrum für Molekulare Medizin Berlin Buch, GERMANY

**Received:** March 27, 2017

**Accepted:** July 6, 2017

**Published:** August 14, 2017

**Copyright:** © 2017 González-Guerra et al. This is an open access article distributed under the terms of the [Creative Commons Attribution License](https://creativecommons.org/licenses/by/4.0/), which permits unrestricted use, distribution, and reproduction in any medium, provided the original author and source are credited.

**Data Availability Statement:** Data is available at the EMBL Array Express repository under the accession number E-MTAB-5791.

**Funding:** This work was supported by Fundación de Investigación Hospitales de Madrid and Tecnológico de Monterrey. The funders had no role in study design, data collection and analysis, decision to publish, or preparation of the manuscript.

## Abstract

Circulating levels of IGF-1 may decrease under several circumstances like ageing, metabolic syndrome, and advanced cirrhosis. This reduction is associated with insulin resistance, dyslipidemia, progression to type 2 diabetes, and increased risk for cardiovascular diseases. However, underlying mechanisms between IGF-1 deficiency and cardiovascular disease remain elusive.

The specific aim of the present work was to study whether the partial IGF-1 deficiency influences heart and/or coronary circulation, comparing vasoactive factors before and after of ischemia-reperfusion (I/R). In addition, histology of the heart was performed together with cardiac gene expression for proteins involved in structure and function (extracellular matrix, contractile proteins, active peptides); carried out using microarrays, followed by RT-qPCR confirmation of the three experimental groups. IGF-1 partial deficiency is associated to a reduction in contractility and angiotensin II sensitivity, interstitial fibrosis as well as altered expression pattern of genes involved in extracellular matrix proteins, calcium dynamics, and cardiac structure and function.

Although this work is descriptive, it provides a clear insight of the impact that partial IGF-1 deficiency on the heart and establishes this experimental model as suitable for studying cardiac disease mechanisms and exploring therapeutic options for patients under IGF-1 deficiency conditions.

**Competing interests:** The authors have declared that no competing interests exist.

## Introduction

A large amount of data support that insulin like growth factor 1 (IGF-1) deficiency increases insulin resistance, impairs lipid metabolism, promotes oxidative damage, and dysregulates the GH/IGF-1 axis [1–3]. Interestingly, growth hormone (GH) and insulin act in symphony with IGF-1 to induce a metabolic coordinated response [4–6]. Also, IGF-1 circulating levels decrease with ageing [7]. This reduction is associated with insulin resistance, dyslipidemia, and progression to metabolic syndrome (MetS) establishment, including also liver steatosis, hyper-lipidemia and visceral obesity [2,8–11].

In this context, consistent studies demonstrate the association between IGF-1 deficiency and increased risk for cardiovascular diseases [12–15], such as ischemic heart disease, ischemic stroke, and congestive heart failure in the elderly [14,16,17], as well as a worse recovery prognosis after an acute myocardial infarction [18]. However, the underlying mechanisms between IGF-1 deficiency and cardiovascular disease are poorly understood. In order to gain more insight into these mechanisms, a previously described experimental model of partial IGF-1 deficiency was used [19]. We included three groups of mice ( $5 \pm 2$  months old): untreated heterozygous (Hz,  $Igf^{+/-}$ ) with partial IGF-1 deficiency; heterozygous mice treated with low doses of IGF-1; and wild type (Wt,  $Igf^{+/+}$ ) mice used as control group.

The specific aim of the present work was to study whether partial IGF-1 deficiency influences heart and/or coronary circulation, comparing vasoactive factors before and after of ischemia-reperfusion (I/R). In addition, histology of the heart was performed together with cardiac gene expression for proteins involved in structure and function (extracellular matrix, contractile proteins, active peptides); carried out using microarrays, followed by RT-qPCR confirmation of the three experimental groups.

## Materials and methods

### Animals and experimental design

The experimental model was established and characterized as previously reported [19]. Briefly, IGF-1 heterozygous mice were obtained by cross-breeding transgenic mice, line MF1 and  $129SV^{Igf1/tm1Arge}$  [20]. Animal genotype determination was performed by PCR analysis (Applied Biosystems, 2720 Thermal Cycler, Spain). DNA was extracted from a piece of tail and specific primers were used to identify both *Igf1* and *Neo* genes (Extract-N-Amp TM Tissue PCR KIT Sigma, USA). Animals were housed in cages in a room with a 12-hour light/dark cycle, constant humidity (50–55%) and temperature (20–22°C). Food (Teklad Global 18% protein rodent diet, Harlan Laboratories, Spain) and water were given *ad libitum*. All experimental procedures were performed in compliance with The Guiding Principles for Research Involving Animals and approved by the Bioethical Committee from our institutions (Tecnologico de Monterrey and San Pablo-CEU University).

As aforementioned, in the experimental design, three groups of  $5 \pm 2$ -months-old male mice were included: Control wildtype group, (Wt,  $Igf1^{+/+}$ ); heterozygous group (Hz,  $Igf1^{+/-}$ ) with partial IGF-1 deficiency; and Hz + IGF-1 group, heterozygous ( $Igf1^{+/-}$ ) mice receiving  $2\mu\text{g}/100\text{g}/\text{day}$  of recombinant human IGF-1 (Chiron Corporation, USA) for 10 days. Wt and Hz groups received also received the same vehicle in which IGF-1 was administered. Total mice used for the study was 60 animals,  $n = 20$  per group.

On day 11, mice were weighed, blood was obtained from submandibular vein and thereafter 10 animals per group were sacrificed by cervical dislocation, 5 per group were anesthetized and used for cardiac functional studies, and the remaining 5 for histopathological studies. For the former, the heart was carefully dissected out, weighed (Denver Instrument, Germany), and

stored in RNAlater (Qiagen-Izasa, Spain) at  $-80^{\circ}\text{C}$  for microarray and PCR analyses. Handling of animals for functional studies are described below. For the latter (histological studies), hearts were included in 4% paraformaldehyde for histological preparations.

IGF-1 serum concentration was determined before and after (day 0 and day 11) the protocol. Serum was isolated from blood obtained from submandibular vein. A commercial enzyme-linked immunosorbent assay (ELISA) was used for determinations (Chiron Corporation, USA), following the manufacturer's instructions, read in a Varioskan spectrophotometer (Thermo Scientific, Spain), and interpreted using SkanIt software (Fisher Scientific, Spain).

## Histopathological studies

Samples of heart for histopathological analysis ( $n = 5$  animals per group) were fixed in 4% paraformaldehyde diluted in PBS solution for 24h. Once they were properly fixed, they were included in ethanol (70%). Samples were embedded in paraffin using the automated equipment (Leica TP 1020, Leica, Switzerland). Longitudinal sections  $4\text{-}\mu\text{m}$ -thick were cut using a microtome (Reichert Jung Biocut 2030, Leica, Switzerland) and subsequently stained with either hematoxylin–eosin or Masson's trichrome. After histological preparations were scanned (Leica, biosystems scanner), two different observers analyzed them using Aperio Image program and estimated the length and thickness of cardiac fibers and collagen depositions, both perivascular and inter-fibrillary, for the whole preparation.

## Heart perfusion

Five animals from each group were used for this assay. As previously described [21,22], hearts were removed from the mice under anesthesia with i.p. sodium pentobarbital (200 mg/kg) and following i.v. injection of heparin (1000 UI). Next, the ascending aorta was cannulated and the heart was subjected to retrograde perfusion with Krebs-Henseleit buffer (115 mMNaCl, 4.6 mMKCl, 1.2 mM $\text{KH}_2\text{PO}_4$ , 1.2 mM  $\text{MgSO}_4$ , 2.5 mM  $\text{CaCl}_2$ , 25 mM  $\text{NaHCO}_3$  and 11 mM glucose) equilibrated with 95% oxygen and 5% carbon dioxide to a pH of 7.3–7.4. Perfusion was initiated in a non-recirculating Langendorff heart perfusion apparatus at a constant flow rate of 11–15 ml/min to provide a basal perfusion pressure of approximately 70 mmHg. Both the perfusion solution and the heart were maintained at  $37^{\circ}\text{C}$ . Coronary perfusion pressure was measured through a lateral connection in the perfusion cannula and left ventricular pressure was measured using a latex balloon inflated to a diastolic pressure of 5–10 mmHg, both connected to Statham transducers (Statham Instruments, Los Angeles, California). Left ventricular developed pressure (systolic left ventricular pressure minus diastolic left ventricular pressure), the first derivative of the left ventricular pressure curve (dP/dt) and heart rate (HR) were calculated from the left ventricular pressure curve. These parameters were recorded on a computer using Chart 5 v5.4.1 software and the PowerLab/8SP data acquisition system (ADInstruments, Colorado Springs, Colorado).

After a 15min equilibration period with constant flow perfusion, the hearts were exposed to global zero-flow ischemia for 30min and re-perfused for 15min at the same flow rate used before ischemia. The duration of ischemia and reperfusion were chosen on the basis of previous studies demonstrating decreases in the endothelium-dependent coronary relaxation without alteration of endothelium-independent coronary relaxation [23,24]. The control hearts were perfused during a similar total time (60min) at constant flow without ischemia. After I/R or perfusion during 60min the coronary vasoconstriction to angiotensin II or the vasodilatation to bradykinin was recorded. Angiotensin II was injected into the perfusion cannula with an infusion pump over 3min at a constant rate to reach a final concentration of  $10^{-12}$ – $10^{-7}\text{M}$ . The relaxation to bradykinin was recorded after precontracting the coronary arteries

with the thromboxane A2 analogue U46619. First, 1028M U46619 was added to the perfusion solution and the concentration was increased progressively until a contractile tone of, 120–140mmHg was obtained. The concentrations of U46619 required to achieve this effect was 161028 to 361028M in control conditions and 561028 to 261027M after I/R. When the contractile tone reached a stable level, bradykinin was injected into the perfusion cannula over 2min at a constant rate to reach a final concentration of 1029–1026M). As the experiments were performed at a constant flow rate, the coronary perfusion pressure provides a measure of the perfusion resistance and characterizes the contraction or relaxation of the coronary arteries.

## Gene expression studies

**Microarray analysis.** As previously reported [1,25,26], heart mRNA was isolated from animals belonging to the three experimental groups in accordance with the protocol outlined in RNAqueousH-Micro Kit (Ambion, USA). Technical procedures for microarray analysis, including quality control of mRNA, labeling, hybridization and scanning of the arrays were performed according to standard operating procedures for Affymetrix protocols (GeneChipH Expression Analysis Manual, Affymetrix, USA). The mRNAs were profiled using Affymetrix HT MG-430. The array signals were normalized using Robust Multichip Averages [27] and batch-effects of the three replicates were corrected using ComBat [28]. Differentially expressed genes between samples were selected using FDR-corrected p-value of 0.01 (p value of <0.05). Data is available at the EMBL Array Express repository under the accession number E-MTAB-5791.

**Total RNA extraction, reverse transcription and quantitative real time polymerase chain reactions (RT-qPCR).** The hearts belonging to this group were cryopreserved in RNA-later (Qiagen-Izasa, Spain) as previously mentioned. The day performing PCR determinations heart samples were homogenized with TRIzol reagent (Invitrogen, UK) by Tissue Lyser LT (Qiagen-Izasa, Spain) and RNA was extracted and purified using the RNeasy Mini Kit (Qiagen), including digestion with RNase-free DNase, following the manufacturer's instructions. RNA purity was checked using Nanodrop A260:A280 ratio (Thermo Fisher Scientific, CA, USA) and fragment integrity analysed with Bioanalyzer 2100 (Agilent Technologies Inc., USA). Purified RNA was then converted to cDNA by using the RNA-to-DNA EcoDry™ Premix (Clontech Labs, USA) for RT-qPCR assays. RT-qPCR assays were performed in a 3100 Avant Genetic Analyzer (Applied Biosystems Hispania, Spain). The thermal profile consisted of an initial 5min melting step at 95°C followed by 40 cycles at 95°C for 10s and 60°C for 60s. Specific Taqman® probes for the selected genes were supplied by Applied Biosystems.

The relative mRNA levels of the genes of interest were normalized to *Tbp* expression using the well-established simplified comparative threshold cycle delta, cycle threshold (CT) method [ $2^{-(\Delta CT \text{ gene of interest} - \Delta CT \text{ actin})}$ ] [29]. *Tbp* was selected for endogenous control after carefully analyzing 12 housekeeping genes (*Actb*, *B2m*, *Gapdh*, *Gusb*, *Hsp90ab1*, *Ldha*, *Pgk1*, *Ppih*, *Sdha*, *Tbp*, *Tfrc*, and *Ubc*). Only 2 out of these 12 vary their expression when comparing Hz with Wt Controls. We assayed the others 10 genes and selected the one, which showed the most stable and reproducible values, which was *Tbp*, a very stable gene coding for a transcription factor that binds the TATA box.

## Statistical analysis

All data represent mean  $\pm$  SEM. Statistical analysis was performed on SPSS 20 (Statistical Package for Social Sciences, USA). Significance was estimated by the Kruskal-Wallis ANOVA followed by a post-hoc test for distribution-free multiple comparisons (Bonferroni). Correlation

was analyzed by Spearman test or "r of Pearson". Differences were considered significant at a level of  $p < 0.05$ .

## Results

### IGF-1 circulating levels and body and heart weights

In accordance with previous series, Hz mice showed a significant reduction of serum circulating IGF-1 levels compared to Wt controls (Hz =  $510.21 \pm 56.12$  ng/ml vs. Wt =  $679.18 \pm 53.14$  ng/ml,  $p < 0.01$ ). The subcutaneous administration of IGF-1 at low doses, during 10 days normalized circulating levels of this hormone (Hz+IGF-1 =  $667.72 \pm 86.69$  ng/ml,  $p < 0.01$  vs. untreated Hz group;  $p = ns$  vs. Wt group).

As expected, IGF-1 deficient mice had a significant reduction in absolute body weight (Hz =  $31.60 \pm 1.11$  g vs. Wt =  $38.83 \pm 2.25$  g,  $p < 0.01$ ), which IGF-1 therapy restored to normal values (Hz+IGF-1 =  $38.17 \pm 1.52$  g,  $p = ns$  vs. Wt).

No differences between groups were found in absolute heart weight. However, when the absolute heart weight was referred to body weight, both groups of Hz mice presented significant increase of relative heart weight (heart weight (mg)/body weight (g), Hz =  $5.2 \pm 0.16$ , Hz + IGF-1 =  $5.3 \pm 0.14$  and Wt =  $4.8 \pm 0.17$ ,  $p < 0.05$  both Hz group vs. Wt group).

### Hemodynamic parameters in the perfused hearts

Table 1 summarizes the hemodynamic values in perfused hearts from controls (Wt,  $Igf^{+/+}$ ), untreated mice with IGF-1 deficiency (Hz,  $Igf^{+/-}$ ) and Hz mice treated with low doses of IGF-1. No significant differences were found before I/R for HR, coronary perfusion pressure, left developed intraventricular pressure, and maximal dP/dt.

I/R induced a significant increase in HR and dP/dt in untreated IGF-1 deficient mice (Hz group). Interestingly, IGF-1 therapy restores these parameters to similar values those found in Wt controls (Hz-IGF-1 vs. Wt,  $p = ns$ ). dP/dt ratio was used as a marker of ventricular contractility. As mentioned before (Table 1), I/R in untreated Hz mice showed a reduction of dP/dt

**Table 1. Hemodynamic values in perfused hearts from controls, mice with IGF-1 deficiency (Hz) and Hz treated with IGF-1 therapy.**

| Results before ischemia                              |                           |                                    |                                   |                            |
|------------------------------------------------------|---------------------------|------------------------------------|-----------------------------------|----------------------------|
| Experimental group                                   | Heart rate (beats/min)    | Coronary perfusion pressure (mmHg) | Left IV developed pressure (mmHg) | dP/dt (mmHg/s)             |
| Controls (Wt) ( $Igf^{+/+}$ )                        | 315 ± 31                  | 59 ± 10                            | 47 ± 7                            | 1748 ± 315                 |
| Untreated IGF-1 deficient mice. (Hz) ( $Igf^{+/-}$ ) | 298 ± 11                  | 63 ± 15                            | 31 ± 7                            | 1256 ± 270                 |
| Deficient mice treated with IGF-1 (Hz + IGF-1)       | 285 ± 31                  | 49 ± 8                             | 36 ± 6                            | 1465 ± 259                 |
| Results after ischemia-reperfusion                   |                           |                                    |                                   |                            |
| Experimental group                                   | Heart rate (beats/min)    | Coronary perfusion pressure (mmHg) | Left IV developed pressure (mmHg) | dP/dt (mmHg/s)             |
| Controls (Wt) ( $Igf^{+/+}$ )                        | 188 ± 17                  | 41 ± 6                             | 25 ± 8                            | 644 ± 239                  |
| Untreated IGF-1 deficient mice. (Hz) ( $Igf^{+/-}$ ) | 264 ± 37 <sup>#</sup>     | 35 ± 4                             | 32 ± 10                           | 1140 ± 363 <sup>#</sup>    |
| Deficient mice treated with IGF-1 (Hz + IGF-1)       | 160 ± 42 <sup>&amp;</sup> | 49 ± 9                             | 26 ± 6                            | 818 ± 259 <sup>&amp;</sup> |

n = 5 animals per group.

#  $p < 0.05$  Hz vs. control group

&  $p < 0.05$  Hz+IGF-1 vs. untreated Hz group.

<https://doi.org/10.1371/journal.pone.0181760.t001>

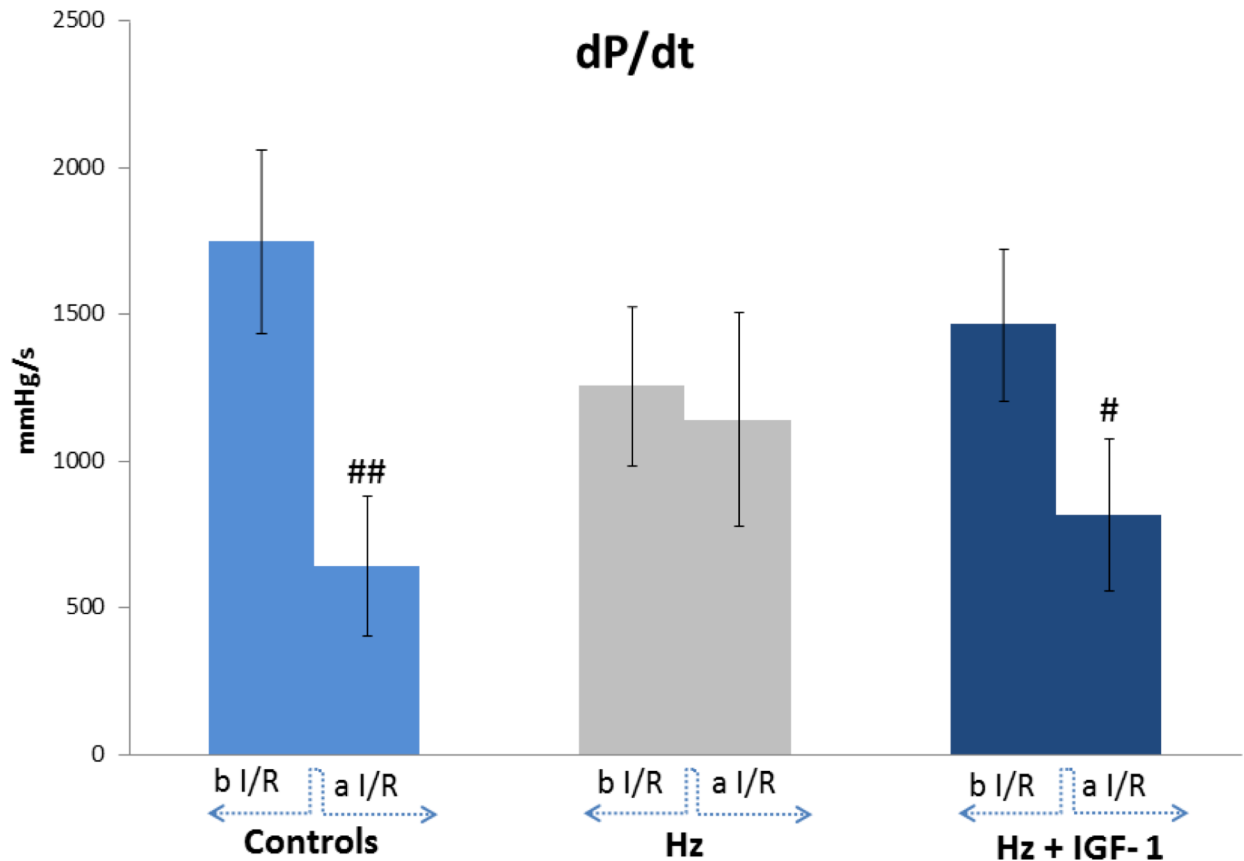

**Fig 1. Hemodynamic values in perfused hearts from the three experimental groups.** dP/dt (mmHg/s), expressing left ventricular contractility, before and after I/R. Before I/R IGF-1 deficient mice showed a reduction of dP/dt but did not reach statistical significance, whereas Hz+IGF-1 mice presented quite similar values to controls (Wt mice). After, I/R, hearts from controls showed a significant reduction in contractility (dP/dt) and similar results were observed in hearts from Hz+IGF-1 group. However, no response after I/R was found in untreated IGF-1 deficient mice ( $p = ns$ ). ##  $p < 0.01$  controls after I/R vs before I/R; #  $p < 0.05$  Hz+IGF-1 after I/R vs the same group before I/R ( $n = 5$  each group).

<https://doi.org/10.1371/journal.pone.0181760.g001>

but did not reached statistical significance, whereas Hz+IGF-1 group presented quite similar values to those found in Wt controls. After I/R, hearts from controls showed, as expected, a significant reduction in contractility (dP/dt) and a similar result was observed in hearts from Hz+IGF-1 group. However, no differences between before and after (I/R) were found in hearts from untreated IGF-1 deficient mice (Hz). These results are summarized in Fig 1.

### Coronary vasoconstriction to angiotensin II (Ang II)

In the perfused hearts from Wt controls and Hz mice treated with IGF-1, injection of Ang II induced vasoconstriction in a dose dependent manner, increasing coronary pressure (Fig 2A). However, such vasoconstriction was absent in perfused hearts belonging to IGF-1 deficient mice (untreated Hz group) at all concentrations except for  $10^{-7}M$  which shows a moderate increase in pressure (Fig 2A). In addition, after I/R, the vasoconstriction achieved by Ang II was reduced in hearts from Wt controls (Fig 2B) and in hearts from IGF-1 treated Hz mice (Hz+IGF-1). However, in perfused hearts from untreated Hz group it was found a very high insensitivity to Ang II, without any appreciable vasoconstrictor effect.

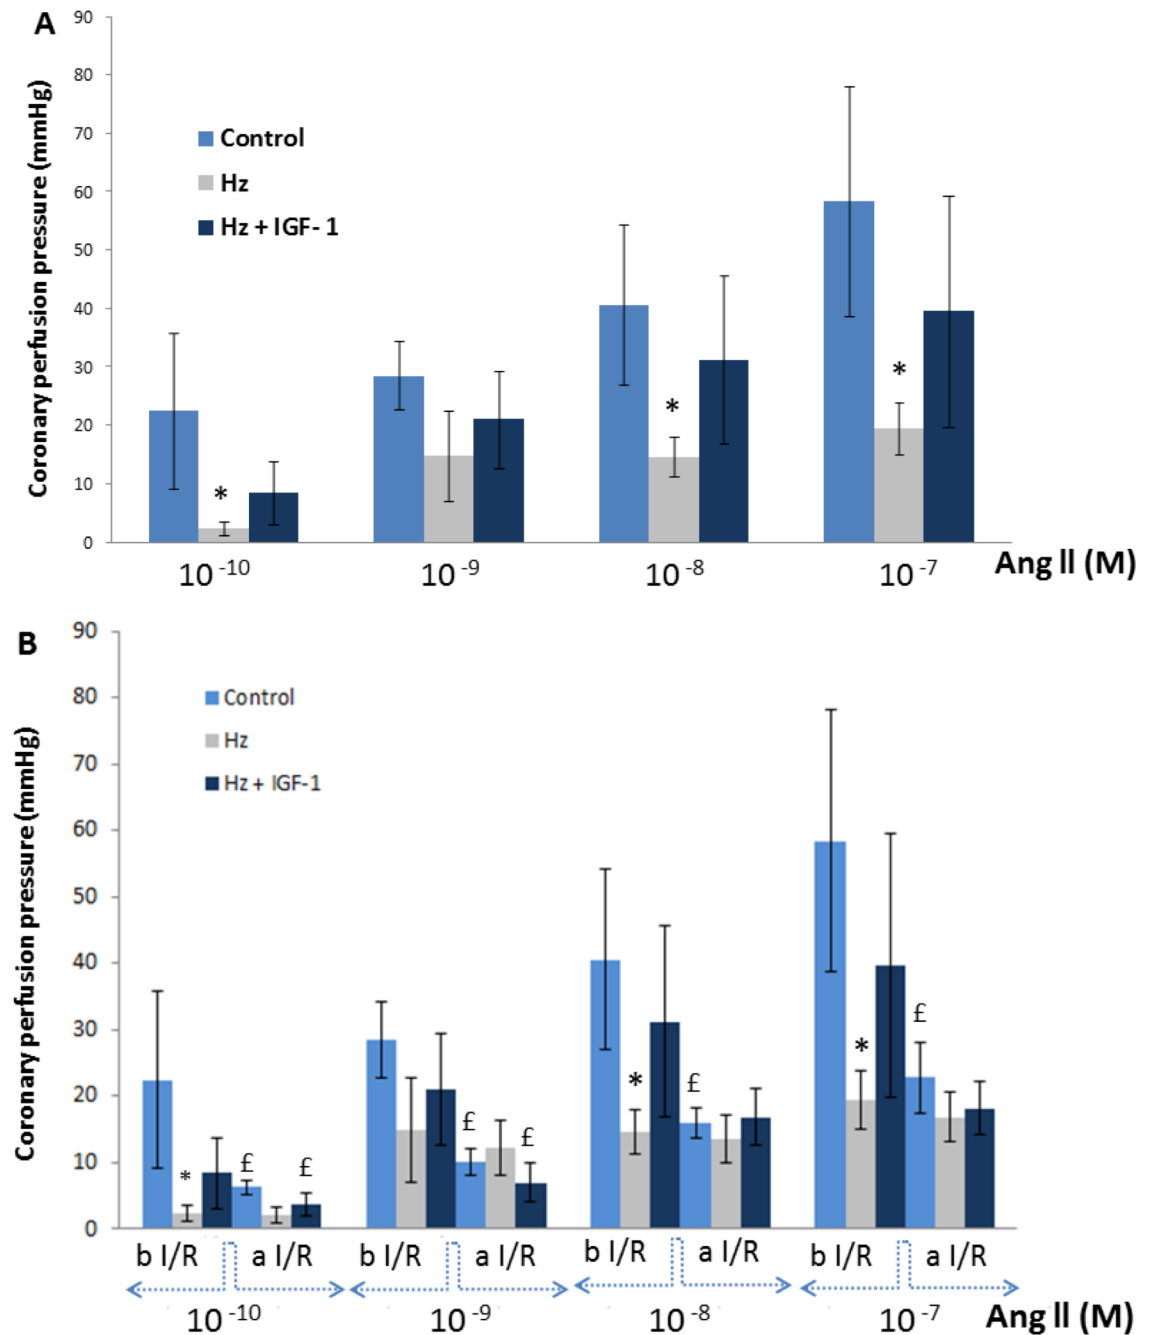

**Fig 2. Coronary vasoconstriction to Ang II. (A)** Coronary perfusion pressure (mmHg) in hearts from the three experimental groups, at different concentrations ( $10^{-10}$  to  $10^{-7}$ ) of Ang II before Ischemia/Reperfusion: Ang II induced vasoconstriction dose-dependent on perfused hearts from controls and Hz+IGF-1, increasing coronary perfusion pressure. However, no effect was observed after Ang II injection in hearts from Hz group. **(B)** Coronary perfusion pressure after I/R: vasoconstriction to Ang II was reduced both in controls and Hz+IGF-1 group. But no response was observed in untreated Hz group, showing a quite total insensibility to AngII (n = 5 per group). \*  $p < 0.05$  Hz vs Controls; £  $p < 0.05$  after. before I/R in the same group (control or Hz+IGF-1).

<https://doi.org/10.1371/journal.pone.0181760.g002>

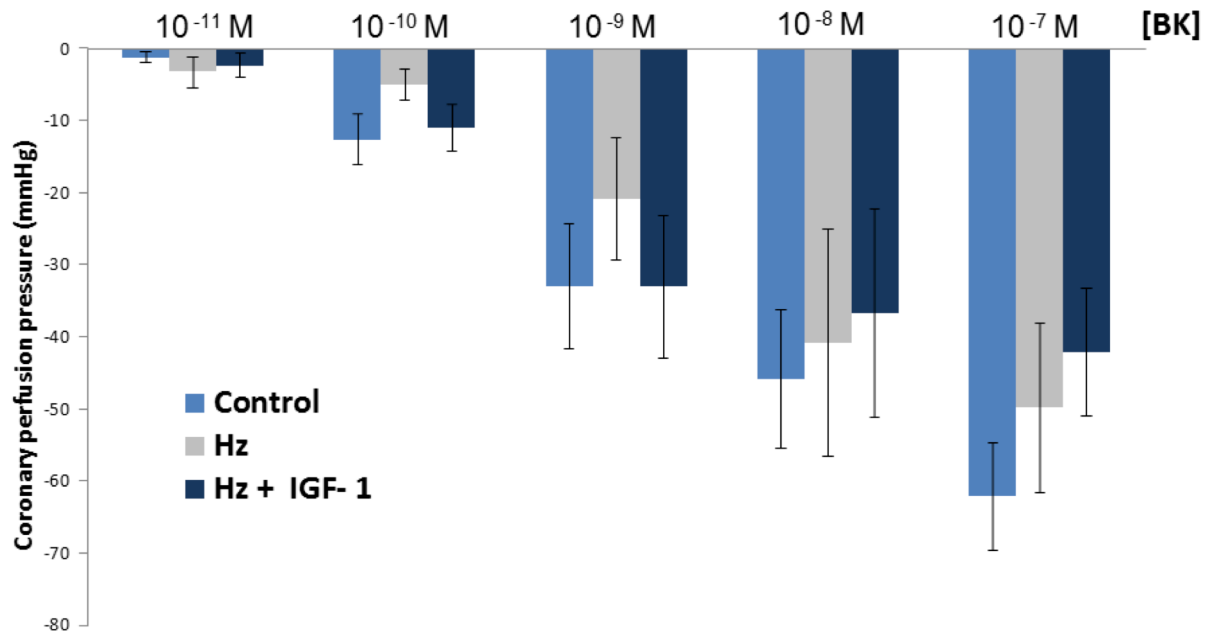

**Fig 3. Coronary vasodilatation to bradykinin: no significant differences were found between the three experimental groups in bradykinin-induced-vasodilatation (n = 5 per group).**

<https://doi.org/10.1371/journal.pone.0181760.g003>

### Coronary vasodilatation to bradykinin

Fig 3 summarizes results obtained from perfused hearts of three experimental groups to different bradykinin concentrations. No significant differences were found between groups in the vasodilatation induced by bradykinin. Vasodilatation to bradykinin is considered as an endothelial dependent response. Results after I/R were deleted as considered irrelevant.

As is shown in Fig 3, only at 10<sup>-9</sup>M bradykinin was observed a similar trend that the one found in response to the biphasic effect of Ang II, where untreated Hz mice showed a diminished vasodilatation, in this case without reaching statistical significance.

### Histopathological analysis

The histopathological analysis study (Masson's Trichrome) showed increased collagen deposition in hearts from untreated IGF-1 deficient mice (Hz group). Fibrosis was observed around vessels and in-between cardiomyocytes. No significant differences were found in the length (data not shown) and thickness of the muscle fibers (Wt 14.66±3.9µm; Hz 16.97±3.15µm; Hz +IGF-1 17.81±2.50µm, p = ns). Fig 4 shows the histopathological findings in the three experimental groups. In addition, focus of interstitial (sub-endocardial or sub-epicardial) fibrosis were formed in 3 of the 5 animals belonging to the untreated Hz group, and in 1 out of 5 from the IGF-1-treated Hz group. No fibrotic focuses were found in Wt mice.

### Heart gene expression analysis

Microarray results analysis revealed, from a total of 45,078 scanned genes, 582 were down-regulated (considered when expression fold-change was -1.5) when confronting expressions between Hz and Wt groups. Also, 296 genes were up-regulated (fold-change over +1.5) between those groups. On the other hand, 645 genes were underexpressed and 371 were over-expressed when comparing Hz+IGF1-1 vs. untreated Hz group.



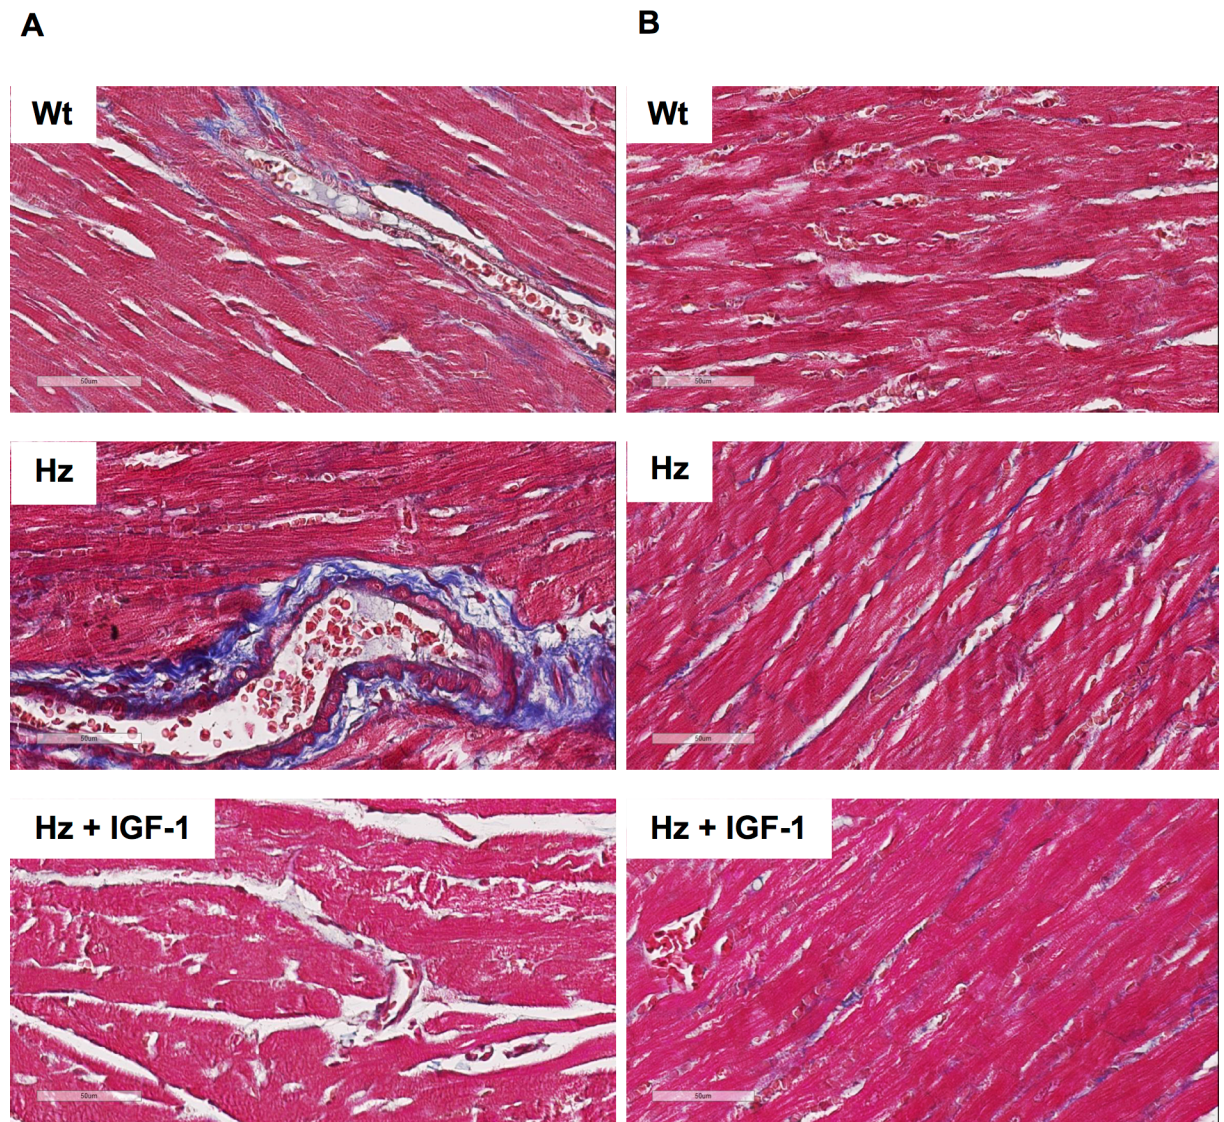

**Fig 4. Histopathological study (n = 5).** (A) Pictures from the three experimental groups showing a remarkable perivascular fibrosis in hearts from Hz group that was not found in controls and Hz+IGF-1 group. (B) Interstitial fibrosis, more evident in untreated Hz group as compared to Wt and Hz+IGF-1 experimental groups.

<https://doi.org/10.1371/journal.pone.0181760.g004>

**IGF-1 related gene expression.** Among the genes with an altered expression, we first focused on those encoding proteins closely related to IGF-1 function (Table 2). RT- qPCR was performed to confirm changes over  $\pm 1.5$  fold-change, such as hypo-expression of *Igf-1* and *Igfbp 3, 4, 5, 6, 7* and *8* as compared to Wt controls. Little effects were induced by IGF-1 replacement therapy in the expression of these genes (Fig 5).

**Expression of genes encoding proteins involved in heart structure, function and pathology.** The most relevant findings were found in genes coding for contractile proteins, calcium dynamic and function, natriuretic peptides type A and B and their receptors, synuclein, among others (Table 3). Of interest, untreated Hz mice showed a noticeable down-regulation for most of these genes. When confirming expression changes by RT-qPCR, results from the treated Hz group were not as expected. Results are included in Fig 6.

**Table 2. Altered expression of genes encoding proteins closely related to IGF1 physiology.**

| Gene name                                           |                      | Untreated Hz ( <i>Hz. Igf<sup>+/+</sup></i> ) vs. Controls (WT. <i>Igf<sup>+/+</sup></i> )<br>(Fold Change) | Hz + IGF1 vs. Untreated Hz<br>(Fold Change) |
|-----------------------------------------------------|----------------------|-------------------------------------------------------------------------------------------------------------|---------------------------------------------|
| <b>insulin-like growth factor 1</b>                 | <b><i>Igf1</i></b>   | <b>-1.72 (<math>p \leq 0.05</math>)</b>                                                                     | <b>1.15 (<math>p \leq 0.01</math>)</b>      |
| insulin-like growth factor I receptor               | <i>Igf1r</i>         | 1.01 ( $p = 0.64$ )                                                                                         | -1.39 ( $p \leq 0.01$ )                     |
| <b>insulin-like growth factor 2</b>                 | <b><i>Igf2</i></b>   | <b>-3.75 (<math>p \leq 0.01</math>)</b>                                                                     | <b>1.07 (<math>p = 0.48</math>)</b>         |
| insulin-like growth factor 2 receptor               | <i>Igf2r</i>         | 1.20 ( $p \leq 0.05$ )                                                                                      | -1.31 ( $p \leq 0.05$ )                     |
| insulin-like growth factor binding protein 1        | <i>Igfbp1</i>        | 1.00 ( $p = 0.95$ )                                                                                         | 1.12 ( $p = 0.21$ )                         |
| insulin-like growth factor binding protein 2        | <i>Igfbp2</i>        | 1.49 ( $p \leq 0.01$ )                                                                                      | 1.09 ( $p = 0.08$ )                         |
| <b>insulin-like growth factor binding protein 3</b> | <b><i>Igfbp3</i></b> | <b>-2.25 (<math>p \leq 0.01</math>)</b>                                                                     | <b>1.01 (<math>p = 0.97</math>)</b>         |
| <b>insulin-like growth factor binding protein 4</b> | <b><i>Igfbp4</i></b> | <b>-1.88 (<math>p \leq 0.01</math>)</b>                                                                     | <b>-1.26 (<math>p \leq 0.05</math>)</b>     |
| <b>insulin-like growth factor binding protein 5</b> | <b><i>Igfbp5</i></b> | <b>-1.79 (<math>p \leq 0.001</math>)</b>                                                                    | <b>-1.66 (<math>p \leq 0.01</math>)</b>     |
| <b>insulin-like growth factor binding protein 6</b> | <b><i>Igfbp6</i></b> | <b>-2.09 (<math>p \leq 0.001</math>)</b>                                                                    | <b>1.96 (<math>p \leq 0.01</math>)</b>      |
| <b>connective tissue growth factor</b>              | <b><i>Ctgf</i></b>   | <b>-1.65 (<math>p \leq 0.001</math>)</b>                                                                    | <b>-1.83 (<math>p = 0.38</math>)</b>        |
| gremlin 1                                           | <i>Grem1</i>         | -1.26 ( $p = 0.09$ )                                                                                        | -1.02 ( $p = 0.23$ )                        |

<https://doi.org/10.1371/journal.pone.0181760.t002>

**Expression of genes coding for proteins implicated in inflammation and extracellular matrix formation in normal and pathological conditions.** Table 4 summarizes data for gene expression related to inflammation processes and extracellular matrix regulation. The most relevant findings are included in Fig 7 showing gene expression confirmed by qPCR-RT.

## Discussion

Our results show that the IGF-1 deficiency is associated with a reduction in heart contractibility, expressed as the quotient dD/dt (Fig 1), and insensitivity to angiotensin II (Fig 2) with interstitial and perivascular fibrosis (Fig 4). In addition, we observed a dramatic expression reduction in genes coding for proteins involved in calcium dynamics and function as well as regulatory myosin proteins,  $\alpha 2$  actin and natriuretic peptides (Fig 6). On the other hand, a 10 day-IGF-1 replacement therapy returned hemodynamic values and fibrosis to normality, albeit not all genes returned to normal values.

One of the most relevant aspects of this work is the presence of fibrosis in hearts not receiving exogenous insult, with the only exception of the partial IGF-1 deficiency. And secondly, that such fibrosis reverted when treated with IGF-1 for only 10 days. Although these findings are difficult to explain, some facts shed light over them. First of all, previous work using this same experimental model found that the single partial IGF-1 deficiency was associated with an altered structure of several organs, such as the brain [26], liver [25], and testicle [30]. Furthermore, the present study shows that hearts belonging to non-treated IGF-1-deficient mice overexpress *Serpine1* and *Serpinh1*, being sensitive to IGF-1 replacement therapy (Fig 7). It is known that *Serpine1*, also called PAI-1, is associated with alterations in extracellular matrix stability [31,32] and also seems to play role in early states of remodeling after damage [33]. *Serpine1* has also been found overexpressed in arterial hypertension and diabetes [34]. In addition *Serpinh1*, also called Hsp 47, has been identified as being a collagen chaperone [35] expressed under stress conditions [36]. Reduced expression of *Serpinh1* after tissue damage is associated with improvement of heart function [37]. Hence, the overexpression under IGF-1 deficiency may partly explain fibrosis.

In the same line, IGF-1-deficient mice displayed genes *Timp3* and *Timp2* significantly hypo-expressed. IGF-1 therapy was able to revert them to similar values to those found in

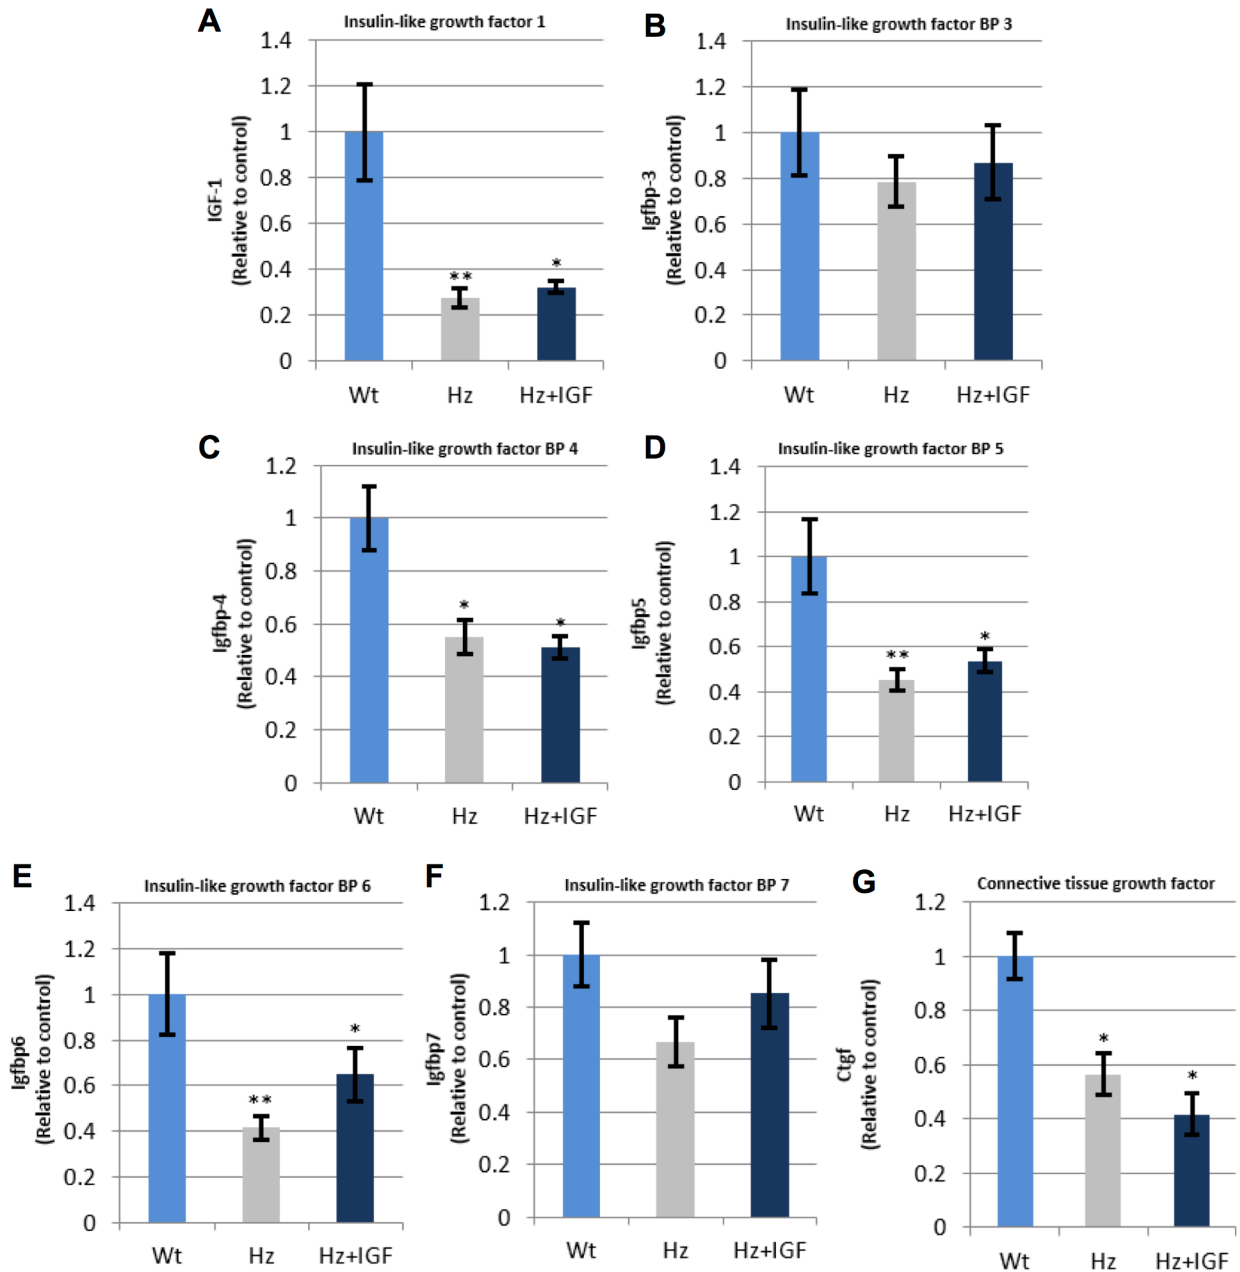

**Fig 5. qPCR-RT measurement of RNA (cDNA) expression of genes encoding proteins closely related to IGF-1 function.** \* $p < 0.05$ , \*\*  $p < 0.01$  vs. controls (Wt group). (A) *Igf1*; (B), (C), (D), (E), (F) *Igfbp3*, 4, 5, and 7, respectively; (G) *Ctgf/Igfbp8*.  $n = 10$ , each group.

<https://doi.org/10.1371/journal.pone.0181760.g005>

controls (Fig 7). *Timp3* expression is relevant in the heart, as already reported [38]. It was shown that animals *Timp3*<sup>(-/-)</sup> after Ang II stimulation, show interstitial fibrosis without hypertrophy.

Another aspect that deserves particular mention is the aforementioned insensitivity to Ang II observed in perfused hearts from the Hz group (Fig 2). Untreated Hz mice did not respond to Ang II, in fact, no vasoconstriction was observed at Ang II increasing concentrations. In the

**Table 3. Expression of genes encoding proteins involved in heart structure, function, and pathology.**

| Gene name                                                  |                      | Untreated Hz (Hz. <i>Igf<sup>+/+</sup></i> ) vs. Controls (WT. <i>Igf<sup>+/+</sup></i> ) (Fold Change) | Hz + IGF1 vs. Untreated Hz (Fold Change) |
|------------------------------------------------------------|----------------------|---------------------------------------------------------------------------------------------------------|------------------------------------------|
| gap junction protein, alpha 1                              | <i>Gja1</i>          | 1.12 (p = 0.43)                                                                                         | <b>1.73(p≤0.05)</b>                      |
| reticulon 4                                                | <i>Rtn4</i>          | 1.21(p = 0.11)                                                                                          | 1.01(p = 0.78)                           |
| troponin I cardiac 3                                       | <i>Tnni3</i>         | 1.03(p = 0.63)                                                                                          | 1.02(p = 0.70)                           |
| troponin T2 cardiac                                        | <i>Tnnt2</i>         | 1.01(p = 0.88)                                                                                          | 1.04(p≤0.05)                             |
| actin, alpha, cardiac muscle 1                             | <i>Actc1</i>         | 1.03(p = 0.14)                                                                                          | 1.01(p = 0.66)                           |
| myosin light polypeptide 7 regulatory                      | <i>Myl7</i>          | <b>-229.49(p≤0.0001)</b>                                                                                | 1.12(p≤0.001)                            |
| myosin light polypeptide 4 regulatory                      | <i>Myl4</i>          | <b>-146.94(p≤0.0001)</b>                                                                                | -1.19(p = 0.75)                          |
| myosin binding protein H-like                              | <i>Mybphl</i>        | <b>-16.12(p≤0.0001)</b>                                                                                 | -1.2(p≤0.01)                             |
| myosin heavy polypeptide 6 cardiac muscle alpha            | <i>Myh6</i>          | 1.13(p = 0.20)                                                                                          | -1.01(p = 0.60)                          |
| nebulette                                                  | <i>Neb1</i>          | -1.06(p = 0.38)                                                                                         | -1.48(p = 0.06)                          |
| periostin osteoblast specific factor                       | <i>Postn</i>         | -1.05 (p = 0.21)                                                                                        | <b>-1.97(p≤0.001)</b>                    |
| tubulin beta 1 class VI                                    | <i>Tubb1</i>         | <b>-1.63(p≤0.01)</b>                                                                                    | -1.05(p = 0.11)                          |
| phospholamban                                              | <i>Pln</i>           | 1.02(p = 0.68)                                                                                          | 1.03(p = 0.75)                           |
| sarcolipin                                                 | <i>Sln</i>           | <b>-159.33(p≤0.0001)</b>                                                                                | <b>1.09(p = 0.12)</b>                    |
| S100 calcium binding protein A1                            | <i>S100a1</i>        | 1.01(p = 0.58)                                                                                          | 1.01(p = 0.56)                           |
| S100 calcium binding protein A6 (calcyclin)                | <i>S100a6</i>        | 1.27(p = 0.35)                                                                                          | -1.13(p = 0.52)                          |
| S100 calcium binding protein A8 (calgranulin A)            | <b>S100a8</b>        | <b>-8.86(p≤0.01)</b>                                                                                    | -1.24(p≤0.01)                            |
| S100 calcium binding protein A9 (calgranulin B)            | <b>S100a9</b>        | <b>-6.81(p≤0.001)</b>                                                                                   | 1.04(p = 0.19)                           |
| ryanodine receptor 2 cardiac                               | <i>Ryr2</i>          | 1.14(p≤0.05)                                                                                            | 1.14(p≤0.001)                            |
| calsequestrin 2                                            | <i>Casq2</i>         | 1.05(p = 0.15)                                                                                          | 1.04(p = 0.15)                           |
| triadin                                                    | <i>Trdn</i>          | -1.15(p = 0.60)                                                                                         | 1.36(p = 0.39)                           |
| calcium channel. voltage-dependent L type alpha 1C subunit | <i>Cacna1c</i>       | 1.37(p≤0.05)                                                                                            | 1.27(p≤0.001)                            |
| junctional sarcoplasmic reticulum protein 1                | <i>Jsrp1</i>         | 1.08(p = 0.40)                                                                                          | -1.03(p = 0.72)                          |
| bridging integrator 1                                      | <i>Bin1</i>          | 1.02(p = 0.98)                                                                                          | -1.03(p = 0.99)                          |
| natriuretic peptide type A                                 | <b>Nppa</b>          | <b>-2.17(p≤0.0001)</b>                                                                                  | -1.67 (p≤0.05)                           |
| natriuretic peptide type B                                 | <b>Nppb</b>          | <b>-1.57(p≤0.05)</b>                                                                                    | 1.35(p≤0.01)                             |
| natriuretic peptide receptor 1                             | <b>Npr1</b>          | <b>1.13(p = 0.69)</b>                                                                                   | 1.05(p = 0.84)                           |
| natriuretic peptide receptor 3                             | <b>Npr3</b>          | <b>-2.68(p≤0.01)</b>                                                                                    | -1.77(p≤0.01)                            |
| synuclein. alpha                                           | <b>Snca</b>          | <b>-3.34(p≤0.0001)</b>                                                                                  | -1.52(p≤0.001)                           |
| pro-platelet basic protein                                 | <b>Ppbb</b>          | <b>-3.85(p≤0.01)</b>                                                                                    | 1.05(p = 0.61)                           |
| actin alpha 2 smooth muscle aorta                          | <b>Acta2 (a-SMA)</b> | <b>-2.2 (p≤0.01)</b>                                                                                    | -1.26 (p≤0.05)                           |
| oxysterol binding protein-like 6                           | <b>osbpl6</b>        | <b>5.01(p≤0.01)</b>                                                                                     | -2.23(p≤0.01)                            |
| apolipoprotein A-I                                         | <b>Apa1</b>          | <b>-5.36(p≤0.01)</b>                                                                                    | -1.03(p = 0.54)                          |
| alpha-2-HS-glycoprotein                                    | <b>Ahsg</b>          | <b>-4.21(p≤0.01)</b>                                                                                    | -1.35(p≤0.05)                            |

<https://doi.org/10.1371/journal.pone.0181760.t003>

same line, untreated Hz mice showed a dramatic reduction of *Acta2* expression, which codes for  $\alpha$ 2actin, a contractile protein of the vascular smooth muscle. Such under-expression may explain the absence of response to Ang II. Accordingly, a significant increase of  $\alpha$ 2actin was observed in hearts from IGF-1 treated Hz mice (Hz+IGF-1) (Fig 6), possibly accounting for the increased response to Ang II in that same group. Mutations in this gene have been reported for causing aneurism and rupture of the aorta [39], as well as in coronary artery disease and stroke [40]. Other mutations in *Acta2* behaved as a multi-systemic syndrome with cerebral vascular disease and pulmonary hypertension [41].

Recent studies reveal non-canonical pathways for IGF1R in the heart which suggest that  $G_{\alpha i}$  proteins also become activated, ultimately leading to [42–45] increases in cyclic adenosine

monophosphate (cAMP), and hence to nuclear  $\text{Ca}^{2+}$  oscillations. This suggests another plausible mechanism for the reduced contractility observed, owing to a decreased  $\text{Ca}^{2+}$  tone caused by IGF-1 deficiency. Consistent with this, insensitivity to Ang II could also, in part, be explained by this. It is widely known that intracellular signaling pathways cross-talk and convergence is really important. Also, recall that the angiotensin receptor AT1 (the most expressed in cardiomyocytes) mainly activates  $G_{\alpha i}$  proteins, alike IGF1R in cardiomyocytes. Thus, IGF-1 deficiency might mitigate such signal in smooth muscle cells now lacking  $G_{\alpha i}$  signal strength.

In addition, mice with partial IGF-1 deficiency (Hz group), showed under-expression of the synuclein alpha gene (*Snca*), whereas treated IGF-1 mice presented values similar to those in controls (Fig 6). Mutations in synuclein alpha have been linked to one type of inherited Parkinson's Disease. Moreover, when mutations in this protein are present, cardiac sympathetic denervation ensues [46,47]. It is still not clear the exact role for this protein. Although some functions have been attributed to it, they are all unspecific. The one exception present in all studies is tyrosine hydroxylase activity. Tyrosine hydroxylase is responsible for the formation of noradrenalin, and aggregation of synuclein alpha [46]. Under this scenario, even though a perfused I/R model does not represent *in vivo* innervation, a chronic deprivation from sympathetic stimulation may have rendered the organ unresponsive to a series of events.

Regarding response to I/R, it would appear that IGF-1 deficiency, besides reducing basal contractility, renders the organ insensible to a normal physiological response to I/R. If carefully observed Fig 1 and Table 1, following I/R there is a marked reduction in contractility and HR within controls and treated animals, as it would be expected. However, untreated IGF-1-deficient animals do not show any variation in HR and contractility after I/R. An explanation could be that, because the IGF-1 deficient mice exhibit decreased basal contractility, the demand for oxygen is not as high as their counterparts. Consequently, being less affected by oxygen deprivation.

It has been proposed that, in mice cardiomyocytes, the overexpression of IGF1 produces physiological hypertrophy by protein translation [48] rather than pathologically altering gene expression like noradrenalin or Ang II. Parallel to this fact, *Igf1r* deletion resulted in normal heart growth although resistant to exercise-induced hypertrophy [49]. This is in accordance with findings disclosed in this work, where no change in absolute heart weight was observed despite the abrupt reduction in body weight. Then again, cardiac mass might not be properly structured, i.e. not as a result of a proper physiological hypertrophy, as suggested by others [48,49]. This may suggest that elevated relative cardiac weight in untreated Hz mice could be due to an excess of fibrotic mass or unorganized extracellular matrix. Fibrosis renders the organ with less functional and contractile mass, contributing to the decreased contractility observed. Also, the increment in interstitial space hinders the diffusion of nutrients and factors, making them partially unavailable, manifesting as a reduction in contractility.

Phospholamban (PLB) and sarcolipin (SLN) are two proteins that regulate the cardiac sarcoplasmic reticulum  $\text{Ca}^{2+}$  ATPase (SERCA2a) [50]. SERCA2a is central in maintaining correct intracellular  $\text{Ca}^{2+}$  following contraction through active  $\text{Ca}^{2+}$  transport into the sarcolemma [51]. Thus, restoring the intracellular  $\text{Ca}^{2+}$  needed for the next contraction cycle [52]. Although the physiological relevance of SLN in the heart was only recently identified, overexpression of SLN reduced the apparent  $\text{Ca}^{2+}$  affinity for SERCA2a. *In vivo* assays of heart function showed a significant decrease in contractility [50]. Our results do not necessarily show the opposite, because overexpression of SLN could also inhibit SERCA, depleting sarcolemmal  $\text{Ca}^{2+}$  reserves and hence no new contraction cycle could effectively begin, affecting cardiac contractility. However, herein we link down-regulated SLN to reduced contractility, which, in our opinion, also makes sense. An increased affinity of SERCA for  $\text{Ca}^{2+}$  would mean an excessively rapid clearing of  $\text{Ca}^{2+}$  from the sarcomeres. Thus, reducing the  $\text{Ca}^{2+}$  tone and,

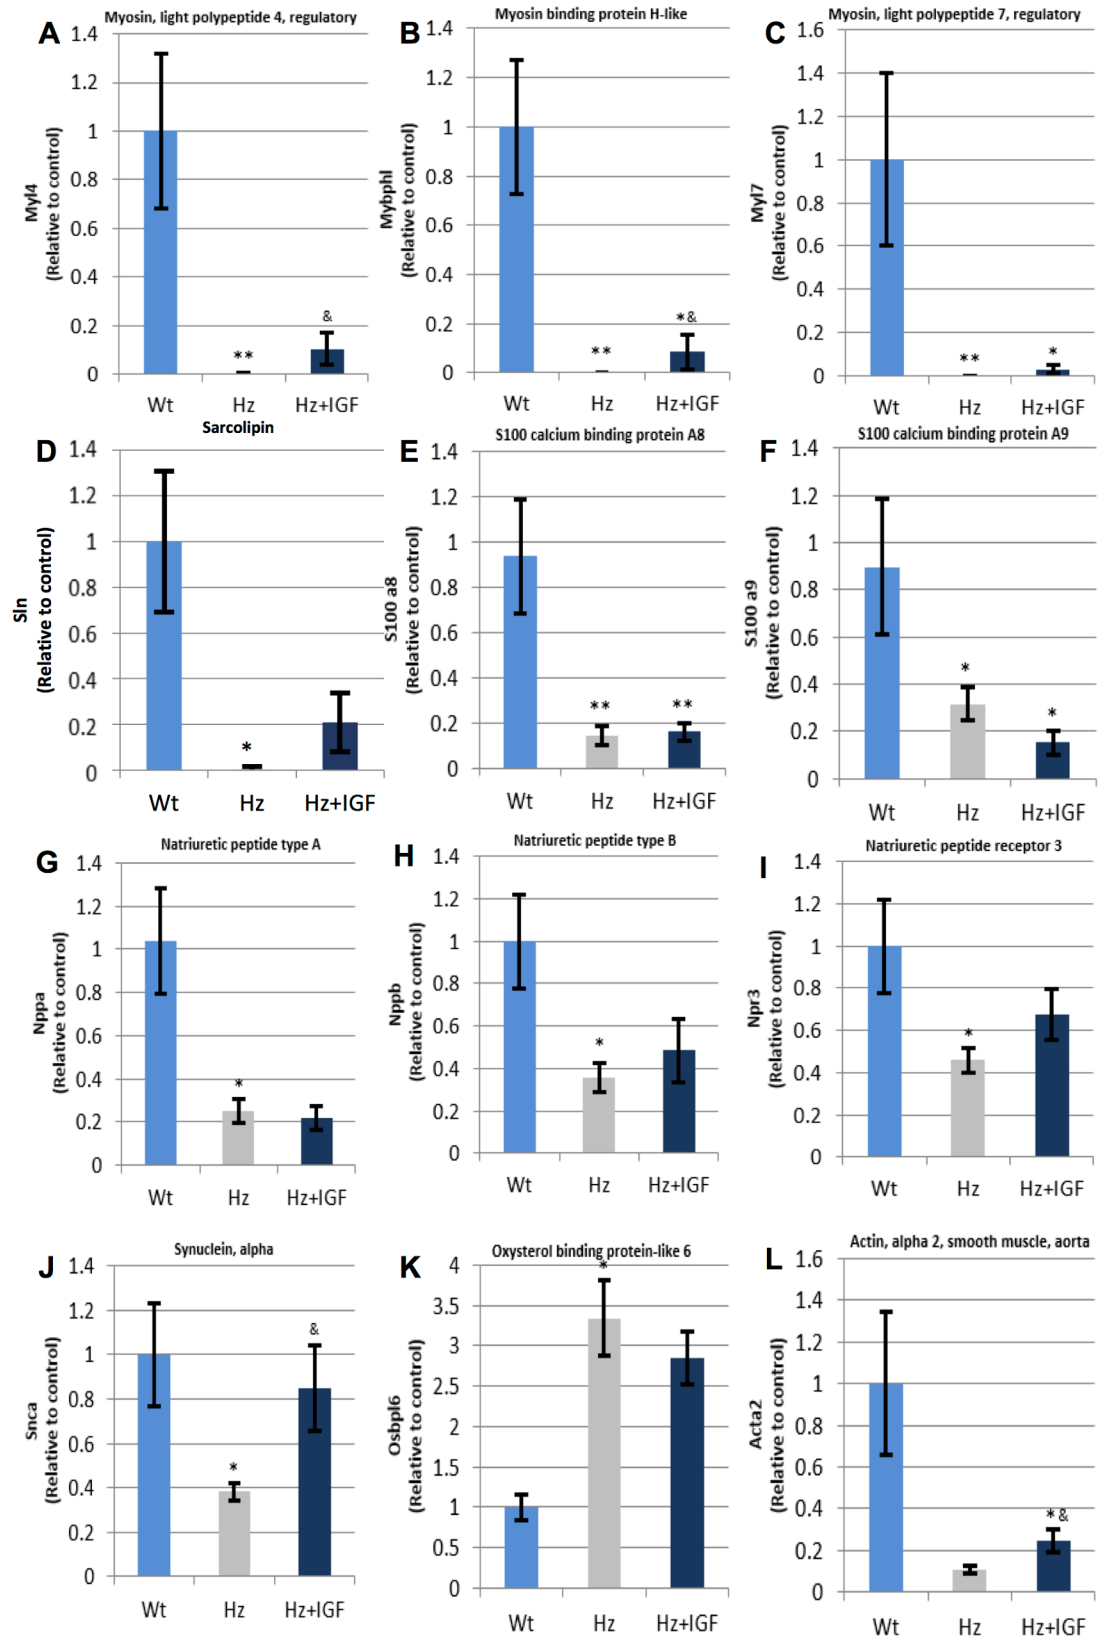

**Fig 6. qPCR-RT measurement of RNA (cDNA) expression for coded proteins involved in heart structure, function, and pathology.** (C), (E), (F), and (G) show low expression in both groups of IGF-1 deficient mice for *Myl7*, *S100a8*, *S100a9*, *Nppa*, respectively; (H), (I), (J), and (L) depict a reduced expression among the untreated Hz group and some recovering with the substitutive treatment (Hz+IGF-1) for *Nppb*, *Npr3*, *Snca*, *Acta2*, respectively; (K) shows a marked genetic overexpression for *Osbpl6* in both Hz group of animals. \*p<0.05, \*\* p 0.01 vs. controls (Wt group); & p<0.05 Hz+IGF-1 group vs untreated Hz mice (n = 10 per group).

<https://doi.org/10.1371/journal.pone.0181760.g006>

with it, muscle force, consistent with a phenotype of reduced cardiac contractility. What is more, the mere IGF-1 deficiency is also associated to an under-expression of genes encoding proteins implicated in calcium dynamics such as s100 calcium BPA9 (*S100a9*) and s100 calcium BPA8 (*S100a8*), which could also be hijacking effective calcium dynamics and concomitant contraction.

As well, significant downregulation of the aquaporin 4 (*Aqp4*) gene (Fig 7G) in both Hz groups was observed. Even though the impact of this finding cannot be elucidated by results the present work, it is interesting to mention that *Aqp4*<sup>(-/-)</sup> mice exhibit abnormalities in proteins related to calcium management [53] in the heart. Also, Alpha 2-Heremans Schmid Glycoprotein (*Ahsg*) gene was found underexpressed in both Hz groups, which seem to have calcification activities and related to inflammation [54]. Others [55] have found in *Ahsg*<sup>(-/-)</sup> mice a greater concentration in pro-fibrogenic factors, augmented fibrosis, and tolerance to ischemia. All of which are consistent with findings in the present study. Moreover, expression of genes involved in the regulation and transport of myosin were also found underexpressed. It remains unknown whether these findings have relevance in heart physiology, nonetheless it might be affecting myosin function and thus contributing cardiac muscle contraction.

Co-cultured cardiac progenitor cells expressing c-Kit marker (receptor expressed in progenitor cells) have shown to secrete IGF-1, which improved cardiomyocyte survival and contractility [56]. Also, it has been discovered that fibroblasts subjected to physical stretching produce larger quantities of IGF1, including a rise in mRNA expression of auricular natriuretic peptide in ventricular myocytes [57], both of which seem to possess a beneficial action in the heart. Consistent with this, we observe a down-regulation of natriuretic peptides A and B, together with its receptor 3 in IGF-1 deficient animals. In the absence of these, the heart is less able to signal hemodynamic stress and therefore being subjected to it. It is demonstrated that IGF-1 replacement therapy did not reverse such downregulation, this may be explained by the fact that these IGF-1 secreting cells (progenitor cells fibroblasts) in the heart express a particular isoform of IGF-1 different from the circulating one [58], and that this isoform exerted protective effects after drug-induced infarct by upregulating sirtuin 1. Now, because the IGF-1 gene has been systemically truncated, these cells are unable to synthesize IGF-1 (any isoform derived from alternative splicing of the *Igf1* gene), and the rhIGF-1 isoform used for the treatment may not effectively activating the same signals that confer that physiological IGF-1 protection.

## Conclusions

In conclusion, data in this work show that IGF-1 partial deficiency is associated to a reduction in contractility and angiotensin II sensitivity, interstitial fibrosis as well as altered expression pattern of genes involved in extracellular matrix proteins, calcium dynamics, and cardiac structure and function. Certainly, these results are descriptive, they however provide a clear insight of the impact that IGF-1 partial deficiency on the heart. As well, this experimental model is suitable for studying cardiac disease mechanisms and exploring therapeutic options for patients under IGF-1 deficiency conditions such as ageing, metabolic syndrome, advanced cirrhosis.

**Table 4. Expression of genes encoding proteins involved on inflammation, extracellular matrix regulation, and in heart metabolism.**

| Gene name                                                        |                        | Untreated Hz ( <i>Hz. Igf<sup>+/+</sup></i> )<br>vs. Controls (WT. <i>Igf<sup>+/+</sup></i> )<br>(Fold Change) | Hz + <i>IGF1</i><br>vs. Untreated Hz<br>(Fold Change) |
|------------------------------------------------------------------|------------------------|----------------------------------------------------------------------------------------------------------------|-------------------------------------------------------|
| <b>complement component 3</b>                                    | <b><i>C3</i></b>       | -1.06(p≤0.05)                                                                                                  | <b>-1.88(p = 0.06)</b>                                |
| histone deacetylase 5                                            | <i>Hdac5</i>           | 1.12(p = 0.21)                                                                                                 | -1.01(p = 0.32)                                       |
| Angiotensinogen                                                  | <i>Agt</i>             | -1.17(p≤0.05)                                                                                                  | 1.04(p = 0.11)                                        |
| chemokine (C-C motif) ligand 11                                  | <i>Ccl11 (Eotaxin)</i> | -1.00 (p = 0.99)                                                                                               | -1.24(p≤0.05)                                         |
| chemokine (C-C motif) ligand 2                                   | <i>Ccl2 (MCP-1)</i>    | -1.27(p≤0.05)                                                                                                  | -1.04(p = 0.97)                                       |
| chemokine (C-C motif) ligand 3                                   | <i>Ccl3(MIP-1a)</i>    | -1.06(p = 0.21)                                                                                                | -1.21(p = 0.53)                                       |
| interleukin 13                                                   | <i>Il13</i>            | 1.06(p = 0.27)                                                                                                 | -1.09(p = 0.33)                                       |
| interleukin 13 receptor alpha 2                                  | <i>Il13ra2</i>         | -1.1 (p = 0.13)                                                                                                | 1.07(p = 0.42)                                        |
| interleukin 4 receptor alpha                                     | <i>Il4ra</i>           | -1.2 (p = 0.15)                                                                                                | -1.05(p = 0.56)                                       |
| interleukin 5                                                    | <i>Il5</i>             | -1.05(p = 0.14)                                                                                                | -1.01(p = 0.94)                                       |
| snail family zinc finger 1                                       | <i>Snai1</i>           | -1.28(p = 0.13)                                                                                                | 1.03 (p = 0.61)                                       |
| lysyl oxidase                                                    | <i>Lox</i>             | 1.04(p = 0.28)                                                                                                 | 1.1(p = 0.07)                                         |
| matrix metalloproteinase 13                                      | <i>Mmp13</i>           | -1.08(p = 0.13)                                                                                                | 1.13(p = 0.55)                                        |
| matrix metalloproteinase 14 (membrane-inserted)                  | <i>Mmp14</i>           | 1.17 (p = 0.39)                                                                                                | 1.56 (p = 0.07)                                       |
| matrix metalloproteinase 2                                       | <i>Mmp2</i>            | 1.08(p≤0.05)                                                                                                   | 1.09(p≤0.05)                                          |
| matrix metalloproteinase 3                                       | <i>Mmp3</i>            | 1.11(p≤0.05)                                                                                                   | -1.32(p≤0.05)                                         |
| matrix metalloproteinase 8                                       | <i>Mmp8</i>            | -1.27(p≤0.001)                                                                                                 | 1.02(p = 0.15)                                        |
| matrix metalloproteinase 9                                       | <i>Mmp9</i>            | 1.08(p = 0.30)                                                                                                 | -1.01(p = 0.85)                                       |
| plasminogen activator. tissue                                    | <i>Plat</i>            | -1.04(p = 0.34)                                                                                                | 1.08 (p = 0.13)                                       |
| plasminogen activator. urokinase                                 | <i>Plau</i>            | 1.03(p = 0.81)                                                                                                 | 1.01(p = 0.88)                                        |
| plasminogen                                                      | <i>Plg</i>             | -1.4(p≤0.05)                                                                                                   | -1 (p = 0.63)                                         |
| <b>serine (or cysteine) peptidase inhibitor clade E member 1</b> | <b><i>Serpine1</i></b> | <b>-1.70(p≤0.01)</b>                                                                                           | -1.18(p = 0.31)                                       |
| <b>serine (or cysteine) peptidase inhibitor clade H member 1</b> | <b><i>Serpinh1</i></b> | <b>1.89(p≤0.001)</b>                                                                                           | -1.07(p = 0.31)                                       |
| tissue inhibitor of metalloproteinase 1                          | <i>Timp1</i>           | -1.19 (p≤0.05)                                                                                                 | -1.42(p = 0.14)                                       |
| <b>tissue inhibitor of metalloproteinase 2</b>                   | <b><i>Timp2</i></b>    | <b>-1.73(p≤0.01)</b>                                                                                           | -1.34 (p≤0.001)                                       |
| <b>tissue inhibitor of metalloproteinase 3</b>                   | <b><i>Timp3</i></b>    | <b>-1.74(p≤0.05)</b>                                                                                           | -1.36(p = 0.07)                                       |
| tissue inhibitor of metalloproteinase 4                          | <i>Timp4</i>           | -1.19(p = 0.20)                                                                                                | -1.16(p≤0.05)                                         |
| integrin alpha 1                                                 | <i>Itga1</i>           | 1.43 (p≤0.05)                                                                                                  | -1.25(p≤0.05)                                         |
| integrin alpha 2                                                 | <i>Itga2</i>           | -1.01(p = 0.42)                                                                                                | -1.06(p = 0.32)                                       |
| <b>integrin alpha 2b</b>                                         | <b><i>Itga2b</i></b>   | <b>-1.49(p≤0.01)</b>                                                                                           | 1.08(p = 0.10)                                        |
| integrin alpha 3                                                 | <i>Itga3</i>           | 1.11 (p = 0.34)                                                                                                | 1.04(p = 0.06)                                        |
| integrin alpha V                                                 | <i>Itgav</i>           | 1.08(p = 0.26)                                                                                                 | 1.09(p = 0.47)                                        |
| integrin beta 1 (fibronectin receptor beta)                      | <i>Itgb1</i>           | 1.02(p = 0.70)                                                                                                 | 1.09(p = 0.44)                                        |
| integrin beta 3                                                  | <i>Itgb3</i>           | 1.21(p = 0.17)                                                                                                 | 1.03(p≤0.05)                                          |
| integrin beta 5                                                  | <i>Itgb5</i>           | 1.08(p≤0.05)                                                                                                   | -1.42(p≤0.05)                                         |
| integrin beta 6                                                  | <i>Itgb6</i>           | 1.46(p≤0.001)                                                                                                  | 1.19(p = 0.14)                                        |
| integrin beta 8                                                  | <i>Itgb8</i>           | 1.07(p = 0.48)                                                                                                 | -1.02(p = 0.68)                                       |
| ae binding protein 1                                             | <i>Aebp1</i>           | -1.2(p≤0.001)                                                                                                  | -1.87(p = 0.07)                                       |
| annexin A4                                                       | <i>Anxa4</i>           | 1.04(p = 0.12)                                                                                                 | -1.54(p = 0.06)                                       |
| collagen type XI alpha 1                                         | <i>Col4a1</i>          | 1.06(p = 0.17)                                                                                                 | -1.09(p = 0.53)                                       |
| <b>collagen type I alpha 1</b>                                   | <b><i>Col1a1</i></b>   | 1.12(p = 0.27)                                                                                                 | <b>-1.6(p≤0.05)</b>                                   |
| collagen type III alpha 1                                        | <i>Col3a1</i>          | 1.06(p = 0.06)                                                                                                 | 1.08(p = 0.31)                                        |
| decorin                                                          | <i>Dcn</i>             | -1.23(p≤0.01)                                                                                                  | -1.42(p≤0.05)                                         |
| dystrophin muscular dystrophy                                    | <i>Dmd</i>             | 1.17(p≤0.05)                                                                                                   | -1.2(p≤0.05)                                          |
| coagulation factor II (thrombin) receptor                        | <i>F2r</i>             | 1.22(p = 0.43)                                                                                                 | -1.23(p = 0.42)                                       |
| <b>fibronectin 1</b>                                             | <b><i>Fn1</i></b>      | <b>-1.81(p≤0.01)</b>                                                                                           | -1.21(p = 0.07)                                       |
| <b>aquaporin 4</b>                                               | <b><i>Aqp4</i></b>     | <b>-2.53(p≤0.05)</b>                                                                                           | -1.22(p≤0.05)                                         |
| <b>phosphoenolpyruvate carboxykinase 1 cytosolic</b>             | <b><i>Pdk1</i></b>     | <b>-2.82(p≤0.01)</b>                                                                                           | <b>2.66(p≤0.01)</b>                                   |

<https://doi.org/10.1371/journal.pone.0181760.t004>



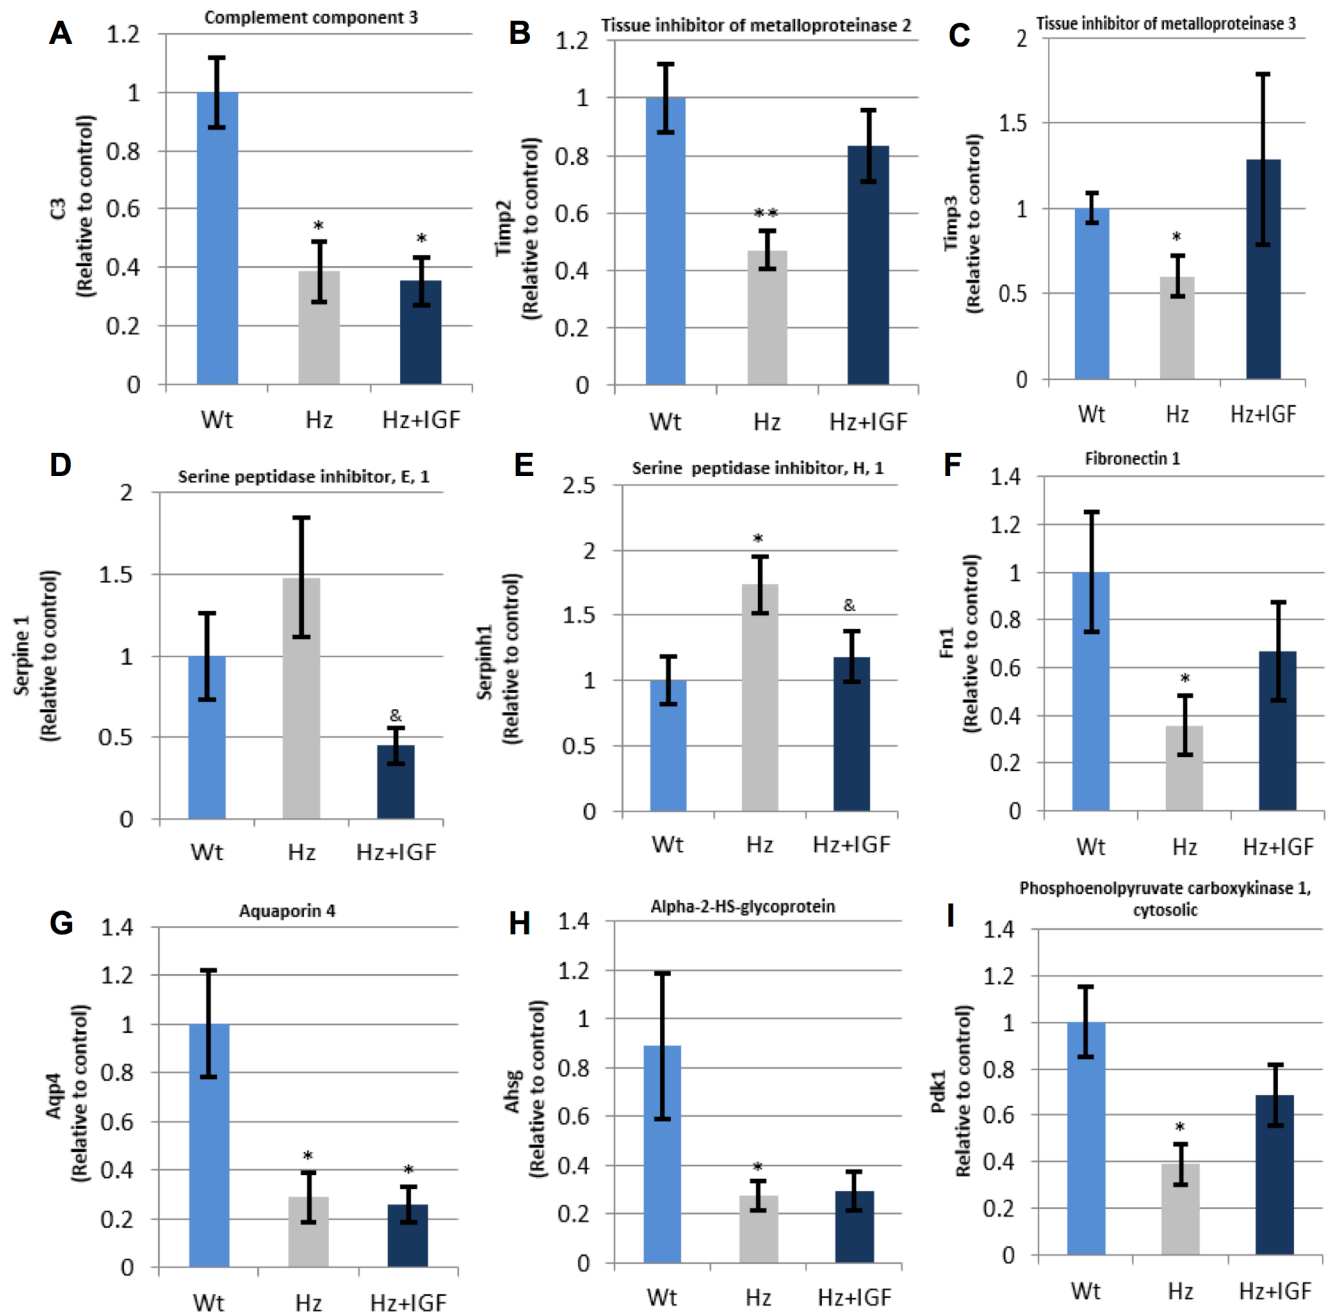

**Fig 7. qPCR-RT measurement of RNA (cDNA) expression for coded proteins involved in inflammation, extracellular matrix regulation, and heart metabolism.** (B), (C), (F), and (I) represent those genes (*Timp2*, *Timp3*, *Fn1*, *Pdk1*, respectively) whose expression is downregulated by IGF-1 deficiency and recovered by substitutive treatment; (A), (G), and (H) refer to those genes (*C3*, *Aqp4*, *Ahsg*, respectively) underexpressed in both Hz groups; (D) shows that *Serpine1* was overexpressed in Hz animals and contrarily underexpressed when substitutive treatment was applied; and (E) illustrates how *Serpinh1* is upregulated by IGF-1 deficiency and how IGF-1 substitutive therapy normalizes its expression (n = 10 animals per group). \*p<0.05, \*\* p 0.01 vs. controls (Wt group); &p<0.05 Hz+IGF-1 group vs. untreated Hz mice.

<https://doi.org/10.1371/journal.pone.0181760.g007>

## Acknowledgments

The authors would like to express their gratitude to Prof. A Efstratiadis (Columbia University, College of Physicians and Surgeons, New York, USA) for kindly providing the transgenic IGF-1 mice. A very special thanks to Dr. Sara Amor, Dr. Paloma Fernandez, and Ms. Isabel Sánchez Cruz for their expert technical assistance. We are also very grateful to Dr. Mariano García-Magariño and MSc. Noemí García for their invaluable help and Dr. Shean Patrick for his kind English revision.

## Author Contributions

**Conceptualization:** José Luis González-Guerra, Inma Castilla-Cortazar, Ángel Luis García-Villalón.

**Data curation:** Inma Castilla-Cortazar, Úrsula Muñoz.

**Formal analysis:** José Luis González-Guerra, Inma Castilla-Cortazar, Gabriel A. Aguirre, Úrsula Muñoz, Miriam Granado, Ángel Luis García-Villalón.

**Funding acquisition:** Inma Castilla-Cortazar.

**Investigation:** José Luis González-Guerra, Inma Castilla-Cortazar, Úrsula Muñoz, Irene Martín-Estal, Elena Ávila-Gallego, Miriam Granado, Juan E. Puche, Ángel Luis García-Villalón.

**Methodology:** José Luis González-Guerra, Inma Castilla-Cortazar, Úrsula Muñoz, Elena Ávila-Gallego, Juan E. Puche.

**Project administration:** Inma Castilla-Cortazar.

**Resources:** José Luis González-Guerra.

**Software:** Gabriel A. Aguirre.

**Supervision:** Inma Castilla-Cortazar.

**Validation:** José Luis González-Guerra.

**Writing – original draft:** José Luis González-Guerra, Inma Castilla-Cortazar, Gabriel A. Aguirre.

**Writing – review & editing:** Inma Castilla-Cortazar, Gabriel A. Aguirre.

## References

1. De Ita JR, Castilla-Cortazar I, Aguirre GA, Sánchez-Yago C, Santos-Ruiz MO, Guerra-Menéndez L, et al. Altered liver expression of genes involved in lipid and glucose metabolism in mice with partial IGF-1 deficiency: an experimental approach to metabolic syndrome. *J Transl Med.* 2015; 13: 326. <https://doi.org/10.1186/s12967-015-0684-9> PMID: 26467524
2. García-Fernández M, Delgado G, Puche JE, González-Barón S, Cortazar IC. Low doses of insulin-like growth factor I improve insulin resistance, lipid metabolism, and oxidative damage in aging rats. *Endocrinology.* 2008; 149: 2433–2442. <https://doi.org/10.1210/en.2007-1190> PMID: 18187555
3. Moses AC. Insulin resistance and type 2 diabetes mellitus: is there a therapeutic role for IGF-1? *Endocr Dev.* 2005; 9: 121–34. <https://doi.org/10.1159/000085762> PMID: 15879694
4. Clemmons DR. The relative roles of growth hormone and IGF-1 in controlling insulin sensitivity. *Journal of Clinical Investigation.* 2004. pp. 25–27. <https://doi.org/10.1172/JCI200420660> PMID: 14702105
5. Yakar S, Setser J, Zhao H, Stannard B, Haluzik M, Glatt V, et al. Inhibition of growth hormone action improves insulin sensitivity in liver IGF-1-deficient mice. *J Clin Invest.* 2004; 113: 96–105. <https://doi.org/10.1172/JCI200417763> PMID: 14702113
6. Aguirre GA, De Ita JR, de la Garza RG, Castilla-Cortazar I. Insulin-like growth factor-1 deficiency and metabolic syndrome. *J Transl Med.* 2016; 14: 3. <https://doi.org/10.1186/s12967-015-0762-z> PMID: 26733412

7. Perry HM. The endocrinology of aging. *Clinical Chemistry*. 1999. pp. 1369–1376. <https://doi.org/10.1126/science.278.5337.419> PMID: 10430820
8. Aguirre GA, De Ita JR, de la Garza RG, Castilla-Cortazar I. Insulin-like growth factor-1 deficiency and metabolic syndrome. *J Transl Med*. 2016; 14: 3. <https://doi.org/10.1186/s12967-015-0762-z> PMID: 26733412
9. Malík J, Stulc T, Wichterle D, Melenovský V, Chytilová E, Lacinová Z, et al. Hyperlipidemia is associated with altered levels of insulin-like growth factor-I. *Physiol Res*. 2008; 57: 919–25. PMID: 18052685
10. Franco C, Bengtsson B-A, Johannsson G. The GH/IGF-1 Axis in Obesity: Physiological and Pathological Aspects. *Metab Syndr Relat Disord*. 2006; 4: 51–56. <https://doi.org/10.1089/met.2006.4.51> PMID: 18370771
11. Mallea-Gil MS, Ballarino MC, Spiraquis A, Iriarte M, Kura M, Gimenez S, et al. IGF-1 levels in different stages of liver steatosis and its association with metabolic syndrome. *Acta Gastroenterol Latinoam*. 2012; 42: 20–6. PMID: 22616493
12. Ungvari Z, Csiszar A. The emerging role of IGF-1 deficiency in cardiovascular aging: Recent advances. *Journals of Gerontology—Series A Biological Sciences and Medical Sciences*. 2012. pp. 599–610. <https://doi.org/10.1093/gerona/gls072> PMID: 22451468
13. Rosen T, Bengtsson BA. Premature mortality due to cardiovascular disease in hypopituitarism. *Lancet*. 1990; 336: 285–288. [https://doi.org/10.1016/0140-6736\(90\)91812-O](https://doi.org/10.1016/0140-6736(90)91812-O) PMID: 1973979
14. Laughlin GA, Barrett-Connor E, Criqui MH, Kritiz-Silverstein D. The Prospective Association of Serum Insulin-Like Growth Factor I (IGF-I) and IGF-Binding Protein-1 Levels with All Cause and Cardiovascular Disease Mortality in Older Adults: The Rancho Bernardo Study. *J Clin Endocrinol Metab*. 2004; 89: 114–120. <https://doi.org/10.1210/jc.2003-030967> PMID: 14715837
15. Conti E, Carrozza C, Capoluongo E, Volpe M, Crea F, Zuppi C, et al. Insulin-like growth factor-1 as a vascular protective factor. *Circulation*. 2004. pp. 2260–2265. <https://doi.org/10.1161/01.CIR.0000144309.87183.FB> PMID: 15477425
16. Johnsen SP, Hundborg HH, Sørensen HT, Orskov H, Tjønneland A, Overvad K, et al. Insulin-like growth factor (IGF) I, -II, and IGF binding protein-3 and risk of ischemic stroke. *J Clin Endocrinol Metab*. 2005; 90: 5937–5941. <https://doi.org/10.1210/jc.2004-2088> PMID: 16131586
17. Vasan RS, Sullivan LM, D'Agostino RB, Roubenoff R, Harris T, Sawyer DB, et al. Serum Insulin-like Growth Factor I and Risk for Heart Failure in Elderly Individuals without a Previous Myocardial Infarction: The Framingham Heart Study. *Ann Intern Med*. 2003; 139: 642–648+I22. <https://doi.org/10.7326/0003-4819-139-8-200310210-00007>
18. Conti E, Andreotti F, Sciahbasi A, Riccardi P, Marra G, Menini E, et al. Markedly reduced insulin-like growth factor-1 in the acute phase of myocardial infarction. *J Am Coll Cardiol*. 2001; 38: 26–32. PMID: 11451284
19. Castilla-Cortazar I, Guerra L, Puche JE, Muñoz U, Barhoum R, Escudero E, et al. An experimental model of partial insulin-like growth factor-1 deficiency in mice. *J Physiol Biochem*. 2014; 70: 129–39. <https://doi.org/10.1007/s13105-013-0287-y> PMID: 24043429
20. Liu JP, Baker J, Perkins AS, Robertson EJ, Efstratiadis A. Mice carrying null mutations of the genes encoding insulin-like growth factor I (Igf-1) and type 1 IGF receptor (Igf1r). *Cell*. 1993; 75: 59–72. PMID: 8402901
21. Granado M, Fernández N, Monge L, Figueras JC, Carreño-Tarragona G, Amor S, et al. Effects of Coronary Ischemia-Reperfusion in a Rat Model of Early Overnutrition. Role of Angiotensin Receptors. Zakar T, editor. *PLoS One*. 2013; 8: e54984. <https://doi.org/10.1371/journal.pone.0054984> PMID: 23383303
22. Granado M, Fernández N, Monge L, Carreño-Tarragona G, Figueras JC, Amor S, et al. Long-Term Effects of Early Overnutrition in the Heart of Male Adult Rats: Role of the Renin-Angiotensin System. Bader M, editor. *PLoS One*. 2013; 8: e65172. <https://doi.org/10.1371/journal.pone.0065172> PMID: 23755190
23. García-Villalón AL, Amezcua YM, Monge L, Fernández N, Climent B, Sánchez A, et al. Effect of ischemia duration and nitric oxide on coronary vasoconstriction after ischemia-reperfusion. *Eur J Pharmacol*. 2005; 509: 165–70. <https://doi.org/10.1016/j.ejphar.2004.11.065> PMID: 15733552
24. García-Villalón AL, Monge L, Fernández N, Salcedo A, Narváez-Sánchez R, Diéguez G. Coronary response to diadenosine pentaphosphate after ischaemia-reperfusion in the isolated rat heart. *Cardiovasc Res*. 2009; 81: 336–43. <https://doi.org/10.1093/cvr/cvn321> PMID: 19029135
25. Lara-Diaz VJ, Castilla-Cortazar I, Martín-Estal I, García-Magarino M, Aguirre GA, Puche JE, et al. IGF-1 modulates gene expression of proteins involved in inflammation, cytoskeleton, and liver architecture. *J Physiol Biochem*. 2017; <https://doi.org/10.1007/s13105-016-0545-x> PMID: 28124277

26. Puche JE, Muñoz Ú, García-Magariño M, Sádaba MC, Castilla-Cortázar I. Partial IGF-1 deficiency induces brain oxidative damage and edema, which are ameliorated by replacement therapy. *Biofactors*. 2003; 42: 60–79. <https://doi.org/10.1002/biof.1255> PMID: 26891019
27. Irizarry RA, Bolstad BM, Collin F, Cope LM, Hobbs B, Speed TP. Summaries of Affymetrix GeneChip probe level data. *Nucleic Acids Res*. 2003; 31: e15. PMID: 12582260
28. Johnson WE, Li C, Rabinovic A. Adjusting batch effects in microarray expression data using empirical Bayes methods. *Biostatistics*. 2007; 8: 118–127. <https://doi.org/10.1093/biostatistics/kxj037> PMID: 16632515
29. Livak KJ, Schmittgen TD. Analysis of relative gene expression data using real-time quantitative PCR and the 2<sup>-</sup>(Delta Delta C(T)) Method. *Methods*. 2001; 25: 402–8. <https://doi.org/10.1006/meth.2001.1262> PMID: 11846609
30. Castilla-Cortazar I, Gago A, Muñoz U, Ávila-Gallego E, Guerra-Menéndez L, Sádaba MC, et al. Mechanisms Underlying Testicular Damage and Dysfunction in Mice with Partial IGF-1 Deficiency and the Effectiveness of IGF-1 Replacement Therapy. *Urology*. 2015; 86: e1–9.
31. Thun GA, Imboden M, Ferrarotti I, Kumar A, Obeidat M, Zorzetto M, et al. Causal and Synthetic Associations of Variants in the SERPINA Gene Cluster with Alpha-1-antitrypsin Serum Levels. *PLoS Genet*. 2013; 9. <https://doi.org/10.1371/journal.pgen.1003585> PMID: 23990791
32. Etique N, Verzeaux L, Dedieu S, Emonard H. LRP-1: a checkpoint for the extracellular matrix proteolysis. *Biomed Res Int*. 2013; 2013: 152163. <https://doi.org/10.1155/2013/152163> PMID: 23936774
33. Dang M-Q, Zhao X-C, Lai S, Wang X, Wang L, Zhang Y-L, et al. Gene expression profile in the early stage of angiotensin II-induced cardiac remodeling: a time series microarray study in a mouse model. *Cell Physiol Biochem*. 2015; 35: 467–76. <https://doi.org/10.1159/000369712> PMID: 25613478
34. Stoynev N, Dimova I, Rukova B, Hadjidekova S, Nikolova D, Toncheva D, et al. Gene expression in peripheral blood of patients with hypertension and patients with type 2 diabetes. *J Cardiovasc Med*. 2014; 15: 702–709. <https://doi.org/10.2459/JCM.0b013e32835dbcc8> PMID: 23337395
35. Taguchi T, Razzaque MS. The collagen-specific molecular chaperone HSP47: is there a role in fibrosis? *Trends Mol Med*. 2007; 13: 45–53. <https://doi.org/10.1016/j.molmed.2006.12.001> PMID: 17169614
36. Abdelnasir A, Sun JR, Cheng YF, Chen HB, Tang S, Kemper N, et al. Evaluation of Hsp47 expression in heat-stressed rat myocardial cells in vitro and in vivo. *Genet Mol Res*. 2014; 13: 10787–10802. <https://doi.org/10.4238/2014.December.18.20> PMID: 25526199
37. Hagiwara S, Iwasaka H, Shingu C, Matumoto S, Hasegawa A, Noguchi T. Heat Shock Protein 47 (HSP47) Antisense Oligonucleotides Reduce Cardiac Remodeling and Improve Cardiac Function in a Rat Model of Myocardial Infarction. *Thorac Cardiovasc Surg*. 2011; 47: 386–392. <https://doi.org/10.1055/s-0030-1250658> PMID: 21412710
38. Fan D, Takawale A, Basu R, Patel V, Lee J, Kandalam V, et al. Differential role of TIMP2 and TIMP3 in cardiac hypertrophy, fibrosis, and diastolic dysfunction. *Cardiovasc Res*. 2014; 103: 268–80. <https://doi.org/10.1093/cvr/cvu072> PMID: 24692173
39. Regalado ES, Guo D, Prakash S, Bensed TA, Flynn K, Estrera A, et al. Aortic Disease Presentation and Outcome Associated With ACTA2 Mutations. *Circ Cardiovasc Genet*. 2015; 8: 457–64. <https://doi.org/10.1161/CIRCGENETICS.114.000943> PMID: 25759435
40. Guo D-C, Papke CL, Tran-Fadulu V, Regalado ES, Avidan N, Johnson RJ, et al. Mutations in smooth muscle alpha-actin (ACTA2) cause coronary artery disease, stroke, and Moyamoya disease, along with thoracic aortic disease. *Am J Hum Genet*. 2009; 84: 617–27. <https://doi.org/10.1016/j.ajhg.2009.04.007> PMID: 19409525
41. Milewicz DM, Østergaard JR, Ala-Kokko LM, Khan N, Grange DK, Mendoza-Londono R, et al. De novo ACTA2 mutation causes a novel syndrome of multisystemic smooth muscle dysfunction. *Am J Med Genet A*. 2010; 152A: 2437–43. <https://doi.org/10.1002/ajmg.a.33657> PMID: 20734336
42. Dalle S, Ricketts W, Imamura T, Vollenweider P, Olefsky JM. Insulin and Insulin-like Growth Factor I Receptors Utilize Different G Protein Signaling Components. *J Biol Chem*. 2001; 276: 15688–15695. <https://doi.org/10.1074/jbc.M010884200> PMID: 11278773
43. Hallak H, Seiler AEM, Green JS, Ross BN, Rubin R. Association of Heterotrimeric Gi with the Insulin-like Growth Factor-I Receptor: RELEASE OF G SUBUNITS UPON RECEPTOR ACTIVATION. *J Biol Chem*. 2000; 275: 2255–2258. <https://doi.org/10.1074/jbc.275.4.2255> PMID: 10644671
44. Kuemmerle JF, Murthy KS. Coupling of the Insulin-like Growth Factor-I Receptor Tyrosine Kinase to Gi2 in Human Intestinal Smooth Muscle: G-DEPENDENT MITOGEN-ACTIVATED PROTEIN KINASE ACTIVATION AND GROWTH. *J Biol Chem*. 2001; 276: 7187–7194. <https://doi.org/10.1074/jbc.M011145200> PMID: 11120746

45. Luttrell LM, van Biesen T, Hawes BE, Koch WJ, Touhara K, Lefkowitz RJ. G Subunits Mediate Mitogen-activated Protein Kinase Activation by the Tyrosine Kinase Insulin-like Growth Factor 1 Receptor. *J Biol Chem.* 1995; 270: 16495–16498. <https://doi.org/10.1074/jbc.270.28.16495> PMID: 7622449
46. GOLDSTEIN DS. Neuroscience and heart-brain medicine: The year in review. *Cleve Clin J Med.* 2010; 77: S34–S39. <https://doi.org/10.3949/ccjm.77.s3.06> PMID: 20622073
47. Tijero B, Gómez-Esteban JC, Lezcano E, Fernández-González C, Somme J, Llorens V, et al. Cardiac sympathetic denervation in symptomatic and asymptomatic carriers of the E46K mutation in the  $\alpha$  synuclein gene. *Parkinsonism Relat Disord.* 2013; 19: 95–100. <https://doi.org/10.1016/j.parkreldis.2012.08.001> PMID: 23000061
48. McMullen JR, Shioi T, Huang W-Y, Zhang L, Tarnavski O, Bisping E, et al. The insulin-like growth factor 1 receptor induces physiological heart growth via the phosphoinositide 3-kinase(p110alpha) pathway. *J Biol Chem.* 2004; 279: 4782–4793. <https://doi.org/10.1074/jbc.M310405200> PMID: 14597618
49. Kim J, Wende AR, Sena S, Theobald H a, Soto J, Sloan C, et al. Insulin-like growth factor I receptor signaling is required for exercise-induced cardiac hypertrophy. *Mol Endocrinol.* 2008; 22: 2531–2543. <https://doi.org/10.1210/me.2008-0265> PMID: 18801929
50. Bhupathy P, Babu GJ, Periasamy M. Sarcolipin and phospholamban as regulators of cardiac sarcoplasmic reticulum Ca<sup>2+</sup> ATPase. *J Mol Cell Cardiol.* 2007; 42: 903–911. <https://doi.org/10.1016/j.yjmcc.2007.03.738> PMID: 17442337
51. Periasamy M, Huke S. SERCA Pump Level is a Critical Determinant of Ca<sup>2+</sup> Homeostasis and Cardiac Contractility. *J Mol Cell Cardiol.* 2001; 33: 1053–1063. <https://doi.org/10.1006/jmcc.2001.1366> PMID: 11444913
52. Asahi M, Kurzydowski K, Tada M, MacLennan DH. Sarcolipin Inhibits Polymerization of Phospholamban to Induce Superinhibition of Sarco(endo)plasmic Reticulum Ca<sup>2+</sup>-ATPases (SERCAs). *J Biol Chem.* 2002; 277: 26725–26728. <https://doi.org/10.1074/jbc.C200269200> PMID: 12032137
53. Cheng Y-S, Tang Y-Q, Dai D-Z, Dai Y. AQP4 knockout mice manifest abnormal expressions of calcium handling proteins possibly due to exacerbating pro-inflammatory factors in the heart. *Biochem Pharmacol.* 2012; 83: 97–105. <https://doi.org/10.1016/j.bcp.2011.10.006> PMID: 22020118
54. Demetriou M, Binkert C, Sukhu B, Tenenbaum HC, Dennis JW. Fetuin/alpha2-HS glycoprotein is a transforming growth factor-beta type II receptor mimic and cytokine antagonist. *J Biol Chem.* 1996; 271: 12755–61. Available: <http://www.ncbi.nlm.nih.gov/pubmed/8662721> PMID: 8662721
55. Merx MW. Myocardial Stiffness, Cardiac Remodeling, and Diastolic Dysfunction in Calcification-Prone Fetuin-A-Deficient Mice. *J Am Soc Nephrol.* 2005; 16: 3357–3364. <https://doi.org/10.1681/ASN.2005040365> PMID: 16177000
56. Kawaguchi N, Smith AJ, Waring CD, Hasan MK, Miyamoto S, Matsuoka R, et al. c-kitpos GATA-4 High Rat Cardiac Stem Cells Foster Adult Cardiomyocyte Survival through IGF-1 Paracrine Signalling. Hotchin NA, editor. *PLoS One.* 2010; 5: e14297. <https://doi.org/10.1371/journal.pone.0014297> PMID: 21179204
57. Hu BS, Landeen LK, Aroonsakool N, Giles WR. An analysis of the effects of stretch on IGF-I secretion from rat ventricular fibroblasts. *Am J Physiol Heart Circ Physiol.* 2007; 293: H677–83. <https://doi.org/10.1152/ajpheart.01413.2006> PMID: 17400715
58. Vinciguerra M, Santini MP, Claycomb WC, Ladurner AG, Rosenthal N. Local IGF-1 isoform protects cardiomyocytes from hypertrophic and oxidative stresses via SirT1 activity. *Aging (Albany NY).* 2009; 2: 43–62. <https://doi.org/10.18632/aging.100107> PMID: 20228935
